# Supplementary material for: Extracorporeal Life Support in Pregnancy: A Systematic Review
Source: PubMed Central journal article supplement — J Am Heart Assoc. 2020 Jun 24;9(13):e016072. doi: 10.1161/JAHA.119.016072 (PMC7670512; doi:10.1161/jaha.119.016072), 2020-06-24
Supplement: JAH3-9-e016072-s001.pdf [file JAH3-9-e016072-s001.pdf]

# **SUPPLEMENTAL MATERIAL**

## Data S1.

### Full search terms

#### ECMO in pregnancy searches

##### Ovid MEDLINE search for the sentinel articles

("23268668" or "23942727" or "22922930" or "28719429" or "28195885" or "25819202" or "29739630" or "27056763" or "26758056" or "27881700" or "26942349" or "25248040" or "19019293" or "26307595" or "26825433").ui.

##### Ovid MEDLINE; Ovid MEDLINE In-Process & Other Non-Indexed Citations; Ovid MEDLINE Epub Ahead of Print (800 results on September 11, 2018)

(exp pregnancy/ or exp pregnancy complications/ or exp obstetric surgical procedures/ or exp maternal health services/ or postpartum period/ or (c-section\* or caesarean\* or cesarean\* or childbirth\* or labor or labors or labour\* or maternal or mother\* or obstetric\* or peri-partum or peripartum or post-natal or postnatal or postpartum or postpartum or pregnan\* or pre-natal or prenatal).tw.) and (exp extracorporeal membrane oxygenation/ or (ecmo or extra-corporeal or extracorporeal).tw.) not ((exp adolescent/ or exp child/ or exp infant/) not exp adult/)

##### Elsevier Embase.com (963 results on September 11, 2018)

('maternal care'/exp OR 'obstetric operation'/exp OR 'obstetrics'/exp OR 'perinatal care'/exp OR 'perinatal period'/de OR 'pregnancy'/exp OR 'pregnancy disorder'/exp OR 'prenatal care'/exp OR 'prenatal period'/de OR caesarean\*:ab,ti OR 'c-section':ab,ti OR 'c-sections':ab,ti OR cesarean\*:ab,ti OR childbirth\*:ab,ti OR labor:ti OR labors:ti OR labours\*:ti OR maternal:ab,ti OR mother\*:ab,ti OR obstetric\*:ab,ti OR 'peri-partum':ab,ti OR peripartum:ab,ti OR 'post-natal':ab,ti OR postnatal:ab,ti OR 'post-partum':ab,ti OR postpartum:ab,ti OR pregnan\*:ab,ti OR 'pre-natal':ab,ti OR prenatal:ab,ti) AND ('extracorporeal oxygenation'/exp OR ecmo:ab,ti OR (((extracorporeal OR 'extra-corporeal') NEAR/3 (support OR membrane OR oxygenation)):ab,ti) NOT ('juvenile'/exp NOT 'adult'/exp)

##### Clarivate Web of Science (992 results on September 11, 2018)

TS=(ECMO OR extracorporeal OR "extra-corporeal") AND TS=("c-section" OR "c-sections" OR caesarean\* OR cesarean\* OR childbirth\* OR labor OR labors OR labour\* OR maternal OR mother\* OR obstetric\* OR peripartum OR "peri-partum" OR "post-natal" OR postnatal OR postpartum OR "post-partum" OR pregnan\* OR "pre-natal" OR prenatal)

##### EBSCOhost CINAHL (325 results on September 11, 2018)

( MH "Extracorporeal Membrane Oxygenation" OR TI (ECMO OR extracorporeal OR "extra-corporeal") OR AB (ECMO OR extracorporeal OR "extra-corporeal") ) AND ( MH ( "pregnancy+" OR "pregnancy complications+" OR "pregnancy outcomes+" ) OR TI ( "c-section" OR "c-sections" OR caesarean\* OR cesarean\* OR childbirth\* OR labor OR labors OR labour\* OR maternal OR mother\* OR obstetric\* OR peripartum OR "peri-partum" OR "post-natal" OR postnatal OR postpartum OR "post-partum" OR pregnan\* OR "pre-natal" OR prenatal) OR AB ("c-section" OR "c-sections" OR caesarean\* OR cesarean\* OR childbirth\* OR labor OR labors OR labour\* OR maternal OR mother\* OR obstetric\* OR peripartum OR "peri-partum" OR "post-natal" OR postnatal OR postpartum OR "post-partum" OR pregnan\* OR "pre-natal" OR prenatal) )

**Table S1. Breakdown of all cases (n = 358).**

| Study (Author, Year)          | Type of Study                                 | Delivery Type | Indication                                              | Disease Process/Indication                                                                                                                                   | ECLS Type                   | ECLS Duration (days) | Maternal Complications                                                                                                                                    | Maternal Mortality | Fetal Complications                                                                                       | Fetal Mortality |
|-------------------------------|-----------------------------------------------|---------------|---------------------------------------------------------|--------------------------------------------------------------------------------------------------------------------------------------------------------------|-----------------------------|----------------------|-----------------------------------------------------------------------------------------------------------------------------------------------------------|--------------------|-----------------------------------------------------------------------------------------------------------|-----------------|
| <sup>34</sup> Abbal 2014      | Case report                                   | C/S           | ARDS                                                    | 31 year old G2P1 at 22 weeks with ARDS due to H1N1, 3 days after delivery underwent ECLS                                                                     | VV                          | 13                   | None                                                                                                                                                      | No                 | Preterm delivery at 24 weeks, NICU admission                                                              | Yes             |
| <sup>35</sup> Abid Memon 2018 | Case report                                   | C/S           | PAH, cardiac arrest                                     | 20 year old at 26 weeks with PAH, Von Willebrand's, worsening PAH, post-delivery PEA s/p CPR onto VA                                                         | VA                          | 24                   | Pericardial effusions, pericardial window, hemoptysis requiring bronchoscopy and cauterization, trach                                                     | No                 | Preterm delivery at 26 weeks, NICU                                                                        | No              |
| <sup>36</sup> Agerstrand 2016 | Single center retrospective review (Columbia) | N/A           | ARDS (17), cardiac arrest (3), PE (2), AFE (2), PAH (1) | ARDS in 17 (flu 6, PNA 2, aspiration 3, TRALI 6, non-pulmonary sepsis 2), ECPR in 3, PE in 2, AFE in 2, PAH in 1; Antepartum in 4 patients, Postpartum in 14 | VV in 14, VA in 1, VAV in 3 | Median 6 days        | ECMO related bleeding complications in 6 (DIC), 4/13 c/s cases had intraabdominal bleeding, 1 limb ischemia resulting in BKA, cannula associated DVT in 5 | 2/18               | 1 miscarriage after cannulation at 18 weeks, 2 miscarriages prior to ECMO cannulation; median GA 32 weeks | 4/18            |
| <sup>36</sup> Agerstrand 2016 | Single center retrospective review (Columbia) | C/S           | PAH                                                     | Patient at 34 and 6/7 weeks with PAH requiring VV support then septic shock requiring VA, antepartum 3 days                                                  | VV then VA                  | 24                   | DIC, abdominal compartment syndrome, VV 12d then VA for 12d                                                                                               | N/A                | N/A                                                                                                       | N/A             |
| <sup>36</sup> Agerstrand 2016 | Single center retrospective review (Columbia) | C/S           | ARDS                                                    | Patient at 28 and 5/7 weeks with H1N1 ARDS, antepartum 16 days                                                                                               | VV                          |                      | Preeclampsia, DIC, bleeding                                                                                                                               | N/A                | N/A                                                                                                       | N/A             |

|                               |                                               |     |           |                                                                                                                                                |    |         |                                                                                              |     |                                    |     |
|-------------------------------|-----------------------------------------------|-----|-----------|------------------------------------------------------------------------------------------------------------------------------------------------|----|---------|----------------------------------------------------------------------------------------------|-----|------------------------------------|-----|
| <sup>36</sup> Agerstrand 2016 | Single center retrospective review (Columbia) | C/S | ARDS      | Patient at 26 and 3/7 weeks with H1N1 ARDS developed renal failure, septic shock, delivered on ECMO c/s, preeclampsia, DIC, multisite bleeding | VV |         | Renal failure and septic shock, delivered on ECMO c/s, preeclampsia, DIC, multisite bleeding | No  | N/A                                | N/A |
| <sup>36</sup> Agerstrand 2016 | Single center retrospective review (Columbia) | C/S | ARDS      | Patient at 32 weeks with ARDS due to urosepsis, antepartum 7 days                                                                              | VV | 6       | N/A                                                                                          | N/A | N/A                                | N/A |
| <sup>37</sup> Alamo 1995      | Case series                                   | VD  | PPH, ARDS | 28 year old at 32 weeks with hypertension c/b fetal distress, forceps delivery, PPH, DIC, preeclampsia and ARDS                                | VV | 2       | Renal failure, septic shock acinetobacter, died 7 days after decannulation                   | Yes | N/A                                | N/A |
| <sup>37</sup> Alamo 1995      | Case series                                   | C/S | ARDS      | 19 year at 37 weeks with hypertension, 3 weeks post-delivery necrotic pancreatitis, DIC, multiorgan failure, ARDS                              | VV | 0.70833 | DIC, renal failure, intracranial hematoma                                                    | Yes | N/A                                | N/A |
| <sup>38</sup> Alyamani 2018   | Case report                                   | C/S | ARDS      | 38 year old G9P8 at 30 and 3/7 weeks with sarcoidosis with ARDS, alveolar hemorrhage, cannulated antepartum                                    | VV | 14      | Profuse bleeding after bronchoscopy, DVT after decannulation                                 | No  | Preterm delivery at 31 weeks, NICU | No  |
| <sup>39</sup> Amancio 2017    | Case report                                   | C/S | ARDS      | 30 year old G1P0 at 27 weeks with H1N1 ARDS with hypoxemic respiratory failure cannulated antepartum                                           | VV | 9       | Enterobacter PNA                                                                             | No  | None                               | No  |
| <sup>9</sup> Anselmi 2015     | Case report and systematic review             | C/S | ARDS      | 32 year old G1P0 at 28 weeks with influenza ARDS                                                                                               | VV | 12      | Transient maternal peroneal nerve paralysis, C/S after decannulation                         | No  | None                               | No  |

|                                     |             |     |                      |                                                                                                                                                                                                   |     |    |                                                                                                         |     |                                    |     |
|-------------------------------------|-------------|-----|----------------------|---------------------------------------------------------------------------------------------------------------------------------------------------------------------------------------------------|-----|----|---------------------------------------------------------------------------------------------------------|-----|------------------------------------|-----|
| <b><sup>40</sup>Arlt 2009</b>       | Case report | C/S | PE, cardiac arrest   | 27 year old with massive PE with PEA, given tPA, ECMO transported with hand-held system, underwent emergent hysterectomy and pulmonary thrombectomy under ECMO and remained on ECMO 4 days postop | VA  | 4  | Vaginal and endotracheal bleeding after thrombolysis, emergency hysterectomy                            | No  | N/A                                | No  |
| <b><sup>41</sup>Barbalic 2016</b>   | Case report | D&E | PPH, ARDS            | 39 year old at 21 weeks with PPROM with miscarriage, D&E with PPH, atony, hysterectomy subsequent DIC, ARDS, hemodynamic instability, hypoxemia                                                   | N/A | 8  | Intraabdominal hemorrhage requiring multiple laparotomies and evacuations, hemolytic anemia             | No  | IUFD prior to ECLS                 | N/A |
| <b><sup>42</sup>Barnes 2018</b>     | Case report | C/S | ILD                  | 24 year old at 31 weeks with RA associated ILD with pulmonary vasculitis with emergent C/S requiring ECMO                                                                                         | N/A | 6  | Multiple infections, colitis, PNA, cardiac arrest in setting of refractory hypoxemia 56 days after ECLS | Yes | Preterm delivery at 31 weeks, NICU | No  |
| <b><sup>43</sup>Bartlett 1974</b>   | Case series | VD  | AFE, cardiac failure | 29 year old at 31 weeks with IUFD IOL c/b AFE and DIC                                                                                                                                             | VA  | 12 | PNA with gram negative septicemia, necrotizing pneumonitis                                              | Yes | IUFD prior to ECLS                 | N/A |
| <b><sup>44</sup>Bataillard 2016</b> | Case series | C/S | PE                   | 35 year old at 27 weeks with acute PE with RV dilation, hemodynamic instability and hypoxia                                                                                                       | VA  | 10 | Groin wound infection                                                                                   | No  | Preterm delivery at 31 weeks, NICU | No  |
| <b><sup>44</sup>Bataillard 2016</b> | Case series | N/A | PE, cardiac arrest   | 26 year old at 10 weeks with PE with cardiac arrest requiring resuscitation - later delivered a healthy baby at 37 weeks                                                                          | VA  | 4  | Groin wound infection treated with antibiotics, R external iliac thrombus                               | No  | N/A                                | No  |
| <b><sup>45</sup>Bautista 2018</b>   | Case report | C/S | PAH, cardiac failure | 18 year old at 24 weeks with pulmonary hypertension due to chronic venoocclusive disease                                                                                                          | VV  | 10 | Worsening after VV ECMO decannulation, lung transplant rejected, hemodynamic                            | Yes | IUFD at 24 hours                   | Yes |

|                                       |                                    |     |                                 |                                                                                                                                                                                                                           |            |     |                                                                                                                                        |     |                                    |     |
|---------------------------------------|------------------------------------|-----|---------------------------------|---------------------------------------------------------------------------------------------------------------------------------------------------------------------------------------------------------------------------|------------|-----|----------------------------------------------------------------------------------------------------------------------------------------|-----|------------------------------------|-----|
|                                       |                                    |     |                                 |                                                                                                                                                                                                                           |            |     | and respiratory failure                                                                                                                |     |                                    |     |
| <sup>46</sup> <b>Bellissima 2011</b>  | Case series                        | N/A | ARDS                            | 31 year old pregnant patient with H1N1 with ARDS                                                                                                                                                                          | N/A        |     | H1N1 with ARDS                                                                                                                         | No  | N/A                                | N/A |
| <sup>47</sup> <b>Benetis 2016</b>     | Case report                        | C/S | Septic shock, ARDS              | 18 year old G1P0 at 26 weeks with sepsis due to endometritis from staph aureus and enterobacter, C/S at 26 weeks c/b DIC, pulmonary edema, hemodynamic instability then hysterectomy developed ARDS, cannulated on PPD# 4 | VA         | 22  | Bleeding at cannulation site, hematoma infection, hemothorax, repeat thoracotomies, sepsis, subclavian artery rupture, R hand numbness | No  | Preterm delivery at 27 weeks, NICU | No  |
| <sup>48</sup> <b>Besnier 2013</b>     | Case report                        | C/S | PPCM, cardiac arrest, Takotsubo | 32 year old at 38 weeks for urgent C/S for prolapsed cord under general anesthesia, VT then cardiac arrest s/p shock LV failure (EF 17%) requiring ECMO, Takotsubo                                                        | VA         | 7   | Bleeding requiring surgical evacuation                                                                                                 | No  | N/A                                | N/A |
| <sup>49</sup> <b>Beurther et 2013</b> | Prospective study ECMO rescue team | N/A | PPCM                            | 3 patients report with PPCM                                                                                                                                                                                               | VA         |     | N/A                                                                                                                                    | 2/3 | N/A                                | N/A |
| <sup>50</sup> <b>Biderman 2017</b>    | Retrospective review               | VD  | Cardiac failure                 | 36 year old with toxic shock due to GAS on PPD# 4                                                                                                                                                                         | VA         | 8.5 | DIC                                                                                                                                    | No  | N/A                                | No  |
| <sup>50</sup> <b>Biderman 2017</b>    | Retrospective review               | C/S | AFE                             | 41 year old with AFE                                                                                                                                                                                                      | VA         | 4   | DIC, tracheotomy                                                                                                                       | No  | N/A                                | No  |
| <sup>50</sup> <b>Biderman 2017</b>    | Retrospective review               | C/S | AFE                             | 41 year old with AFE                                                                                                                                                                                                      | VA         | 6   | DIC, tracheotomy                                                                                                                       | No  | N/A                                | No  |
| <sup>50</sup> <b>Biderman 2017</b>    | Retrospective review               | VD  | ARDS                            | 37 year old at 13 weeks with ARDS due to H1N1                                                                                                                                                                             | VA then VV | 16  | DIC, tracheotomy; VA 7 d then VV for 9                                                                                                 | Yes | SAB                                | Yes |
| <sup>50</sup> <b>Biderman 2017</b>    | Retrospective review               | C/S | Cardiac failure                 | 30 year old at 33 weeks with infectious PNA                                                                                                                                                                               | VA         | 32  | Tracheotomy                                                                                                                            | Yes | N/A                                | No  |

|                                  |                      |                   |                                |                                                                                                                              |     |                                                                         |                                                                                                                                                                 |      |                               |                          |
|----------------------------------|----------------------|-------------------|--------------------------------|------------------------------------------------------------------------------------------------------------------------------|-----|-------------------------------------------------------------------------|-----------------------------------------------------------------------------------------------------------------------------------------------------------------|------|-------------------------------|--------------------------|
| <sup>50</sup> Biderman 2017      | Retrospective review | VD                | Septic shock, ARDS             | 30 year old at 20 weeks with infectious PNA (h flu)                                                                          | VA  | 3                                                                       | Tracheotomy                                                                                                                                                     | No   | Died 3 days into ECLS         | Yes                      |
| <sup>50</sup> Biderman 2017      | Retrospective review | C/S               | Septic shock, ARDS             | 19 year old with septic shock ARDS diffuse peritonitis PPD# 2                                                                | VA  | 11                                                                      | Tracheotomy                                                                                                                                                     | No   | N/A                           | No                       |
| <sup>50</sup> Biderman 2017      | Retrospective review | C/S               | Septic shock, ARDS             | 22 year old with infectious PNA PPD# 7                                                                                       | VA  | 20                                                                      | Tracheotomy                                                                                                                                                     | Yes  | N/A                           | No                       |
| <sup>50</sup> Biderman 2017      | Retrospective review | VD                | Cardiac failure, heart disease | 38 year old with critical MS c/b cardiogenic shock, LV failure, pulmonary edema on PPD# 1                                    | VA  | 20                                                                      | N/A                                                                                                                                                             | No   | TAB at 12 weeks prior to ECLS | Not counted as mortality |
| <sup>50</sup> Biderman 2017      | Retrospective review | VD                | Cardiac failure                | 40 year old with cardiogenic shock, LV failure on PPD# 5                                                                     | VA  | 6                                                                       | N/A                                                                                                                                                             | No   | N/A                           | No                       |
| <sup>50</sup> Biderman 2017      | Retrospective review | C/S               | AFE                            | 31 year old woman with AFE                                                                                                   | VA  | 0                                                                       | Death                                                                                                                                                           | Yes  | N/A                           | No                       |
| <sup>51</sup> Bok 2014           | Case report          | VD                | ARDS                           | 44 year old at 23 weeks with cryptogenic organizing PNA, VV ECMO then listed for lung transplant, stillbirth at 23 weeks     | VV  | 13                                                                      | Waited for lung transplant                                                                                                                                      | No   | SAB at 23 weeks               | Yes                      |
| <sup>52</sup> Bouabdallaoui 2017 | Case series          | VD (7)<br>C/S (3) | PPCM                           | 10 patients at average GA at 38 weeks with PPCM                                                                              | VA  | Peripheral support (all fem-fem) median 3 days, Central support 51 days | Pulmonary edema (2), bleeding at cannulation site (1), limb ischemia (1) and infection at cannulation site c/b septic shock (1), on dialysis before ECMO in 30% | 5/10 | N/A                           | N/A                      |
| <sup>53</sup> Bowkalo w 2011     | Case report          | VD                | ARDS                           | 24 year old G4P2 at 20 and 6/7 weeks with H1N1 ARDS                                                                          | N/A | 28                                                                      | Died                                                                                                                                                            | Yes  | SAB at 21 weeks               | Yes                      |
| <sup>54</sup> Bruch 2013         | Case report          | VD                | PE, cardiac arrest             | 31 year old G1P0 at 19 weeks PE circulatory shock requiring CPR, ECLS and thrombectomy, stillbirth at 19 weeks requiring D&C | VA  | 5                                                                       | Bleeding requiring transfusions                                                                                                                                 | No   | SAB on ECMO                   | Yes                      |

|                                     |             |     |                              |                                                                                                                                                                                                |                        |         |                                                                                                                                   |     |                                         |     |
|-------------------------------------|-------------|-----|------------------------------|------------------------------------------------------------------------------------------------------------------------------------------------------------------------------------------------|------------------------|---------|-----------------------------------------------------------------------------------------------------------------------------------|-----|-----------------------------------------|-----|
| <sup>55</sup> <b>Cerene 1977</b>    | Case report | VD  | Aspiration pneumonitis, ARDS | 32 year old with ARDS due to gastric aspiration during forceps delivery c/b cardiovascular collapse                                                                                            | VA                     | 4.95833 | Mild bleeding at insertion site                                                                                                   | No  | N/A                                     | N/A |
| <sup>56</sup> <b>Chambers 2018</b>  | Case report | N/A | Sickle cell crisis           | 20 year old G1P0 at 25 and 3/7 weeks with sickle cell with acute chest syndrome, cannulated postpartum                                                                                         | VV                     |         | Blood transfusions                                                                                                                | No  | Preterm delivery                        | No  |
| <sup>57</sup> <b>Champion 2017</b>  | Case report | C/S | PPCM                         | 30 year old at 34 weeks with TTP c/b HELLP and sepsis with salmonella, PPCM day on PPD# 4                                                                                                      | VA                     | 18      | Renal failure, discharged after 45 days                                                                                           | No  | Preterm delivery at 34 weeks            | No  |
| <sup>58</sup> <b>Chao 2016</b>      | Case series | VD  | ARDS                         | 35 year old G1P0 at 16 weeks with viral PNA with hypoxemic respiratory failure                                                                                                                 | VV                     | 9       |                                                                                                                                   | No  | SAB at 16 weeks                         | Yes |
| <sup>58</sup> <b>Chao 2016</b>      | Case series | C/S | PPCM                         | 29 year old G1P0 at 34 weeks with PPCM s/p C/S sent home on diuretics and digoxin but returned 1 month later requiring mechanical ventilation and pressors so put on ECMO found to have EF 18% | VA                     | 8.5     |                                                                                                                                   | No  | Preterm delivery at 34 weeks            | No  |
| <sup>59</sup> <b>Chehab 2015</b>    | Case report | C/S | PPCM                         | 23 year old at 35 weeks with PPCM EF<15% within 1 week of delivery                                                                                                                             | VA                     |         | Major hemorrhage, multiorgan failure, hemothorax, cannula dislodgement                                                            | Yes | Preterm delivery at 35 weeks            | N/A |
| <sup>60</sup> <b>Chillcott 1995</b> | Case report | VD  | ARDS, sepsis                 | 20 year old G1P0 at 26 weeks with staph aureus septicemia, hypoxemia, ARDS underwent extracorporeal CO <sub>2</sub> removal on PPD# 16                                                         | ECCO <sub>2</sub> (VV) | 47      | Impaired skin integrity, pulmonary bleeding, HSV PNA, trach, hyperbilirubinemia, proteus and enterobacter PNA, oxygenator changes | No  | Preterm delivery at 26 weeks, NICU, IVH | No  |



|                                    |                           |     |                      |                                                                                                                              |          |      |                                                                                                          |    |                                                                           |                          |
|------------------------------------|---------------------------|-----|----------------------|------------------------------------------------------------------------------------------------------------------------------|----------|------|----------------------------------------------------------------------------------------------------------|----|---------------------------------------------------------------------------|--------------------------|
| <b><sup>61</sup>Cho 2006</b>       | Case report               | C/S | PAH, cardiac failure | 24 year old at 38 weeks with PAH c/b RV failure post-C/S and aberrant pulmonary artery on PPD# 4                             | VV       | 33   | HIT, thrombocytopenia, required IVIG, massive pulmonary hemorrhage, discovered to have aberrant right PA | No | N/A                                                                       | No                       |
| <b><sup>62</sup>Choi 2016</b>      | Case report in commentary | C/S | Cardiac arrest       | 26 year old G1P0 at 30 weeks with HELLP c/b IUFD s/p c/s c/b seizure followed by cardiac arrest/CPR                          | VA       |      | Hemolysis, need for blood transfusion, dialysis, discharged 1 month post arrest                          | No | Pre-ECMO fetal demise                                                     | Not counted as mortality |
| <b><sup>63</sup>Chuang 2015</b>    | Case report               | C/S | PE, cardiac arrest   | 29 year old G1P1 with PE s/p PEA and CPR underwent PTE 2 days after admission on PPD# 2                                      | VA       | 2    | Burn injuries from resuscitation in ED, staph and influenza infections, discharged day 43                | No | N/A                                                                       | N/A                      |
| <b><sup>64</sup>Clark 1991</b>     | Case series               | N/A | ARDS                 | 33 year old at 12 weeks with varicella PNA c/b ARDS                                                                          | VV       | 3.75 | Blood transfusions                                                                                       | No | TAB at 15 weeks due to concern for fetal anomalies incurred from ECLS     | Yes                      |
| <b><sup>65</sup>Clifford 2018</b>  | Case report               | C/S | Asthma               | 33 year old G3P1 at 23 and 1/7 weeks with status asthmaticus, and possible PA clot on TTE                                    | VV       | 6    | VAP with moraxella and MSSA, influenza A                                                                 | No | IUGR                                                                      | No                       |
| <b><sup>66</sup>Coscia 2012</b>    | Case series               | VD  | ARDS, malignancy     | 31 year old at 24 weeks with recent M3 AML hypoxemic respiratory failure c/b ARDS, spontaneously delivered 48 hours into iLA | iLA (VV) | 8    | Died 53 days after admission from AML complications                                                      | No | Unclear outcome, spontaneous preterm delivery at 24 weeks, NICU admission | N/A                      |
| <b><sup>67</sup>Courouble 2011</b> | Case report               | VD  | ARDS                 | 21 year old G2P0 at 23 weeks with H1N1 ARDS                                                                                  | VV       | 9    | Multiple transfusions, epistaxis during ECMO run, staph bacteremia after decannulation                   | No | None                                                                      | No                       |

|                               |             |     |                                |                                                                                                                                                                                                |            |    |                                                                                                     |     |                                                                     |     |
|-------------------------------|-------------|-----|--------------------------------|------------------------------------------------------------------------------------------------------------------------------------------------------------------------------------------------|------------|----|-----------------------------------------------------------------------------------------------------|-----|---------------------------------------------------------------------|-----|
| <sup>68</sup> Crawford 2015   | Case report | C/S | ARDS                           | 37 year old G1P0 at 21 weeks with influenza A ARDS c/b HELLP with newly diagnosed LAM and DAH                                                                                                  | VV         | 14 | Had lung biopsy for LAM during ECMO run                                                             | No  | Preterm delivery at 24 weeks, NICU, respiratory/nutritional support | No  |
| <sup>69</sup> Creanga 2010    | Case series | C/S | ARDS                           | 26 year old at 32 weeks with H1N1 ARDS mechanically ventilated, C/S in ICU for maternal distress and hypotension, PNA and ARDS, septic shock, transferred for ECMO on PPD# 12                  | VV         |    |                                                                                                     | Yes | Preterm delivery at 32 weeks, death                                 | Yes |
| <sup>70</sup> Cunningham 2006 | Case report | VD  | ARDS                           | 33 year old at 24 weeks with ARDS requiring ECMO then post-cannulation 3 days developed HELLP                                                                                                  | VV         | 3  | Renal failure, 3 days after d/c ECMO vaginal bleeding and spontaneously delivered fetus at 25 weeks | No  | Preterm delivery at 25 weeks, intubated to NICU and RDS             | No  |
| <sup>71</sup> Dabas 2018      | Case report | C/S | Heart disease, cardiac arrest  | 32 year old with d-TGA s/p Mustard with RV dysfunction s/p C/S c/b cardiac arrest, CPR and ECMO support                                                                                        | VA then VV | 3  | N/A                                                                                                 | No  | N/A                                                                 | No  |
| <sup>72</sup> DiLorenzo 2016  | Case report | C/S | Cardiac failure, heart disease | Patient at 33 weeks with MV regurgitation due to prosthetic valve thrombosis with NYHA Class III HF planned C/S after VA ECMO and MV replacement, ECMO in OR immediately before c/s            | VA         | 2  | None                                                                                                | No  | N/A                                                                 | No  |
| <sup>73</sup> Ecker 2012      | Case report | C/S | PPH, cardiac arrest            | 43 year old multiparous woman at 36 and 4/7 weeks with placenta previa with bleeding went to emergency C/S, upon closing fascia became unstable, PEA arrest underwent CPR and ECMO cannulation | VA         | 1  | Bleeding, hysterectomy, need for HD, encephalopathy                                                 | No  | N/A                                                                 | N/A |

|                                    |             |     |                       |                                                                                                                                                              |             |     |                                                                                                                                                                      |     |      |     |
|------------------------------------|-------------|-----|-----------------------|--------------------------------------------------------------------------------------------------------------------------------------------------------------|-------------|-----|----------------------------------------------------------------------------------------------------------------------------------------------------------------------|-----|------|-----|
| <b><sup>74</sup>Ellington 2011</b> | Case series | N/A | ARDS                  | 2 patients with postpartum H1N1 ARDS                                                                                                                         | N/A         |     |                                                                                                                                                                      | 1/2 |      | N/A |
| <b><sup>75</sup>Erb 2013</b>       | Case report | C/S | PPCM                  | 32 year old G1P0 at 37 weeks with twin pregnancy c/b preeclampsia, PPD# 6 pulmonary edema EF 15% put on BiVAD, ECMO, IABP                                    | N/A         | 1.5 | None                                                                                                                                                                 | No  | N/A  | N/A |
| <b><sup>76</sup>Evans 2014</b>     | Case report | N/A | SCAD, cardiac failure | Patient with ACS on PPD# 14 diagnosed with SCAD to the LAD with EF 15-20% s/p CABG with failure to wean from CPB                                             | VA          | 10  | Rehab                                                                                                                                                                | No  | None | N/A |
| <b><sup>77</sup>Ezri 2009</b>      | Case report | N/A | PPCM                  | 32 year old at 7 weeks with ectopic pregnancy s/p lap salpingectomy c/b SVT, pulmonary edema, hypoxemia, severe LV dysfunction EF 10-15% on VA ECMO and IABP | VA          | 7   | Coagulopathy, hemolysis, thrombocytopenia, transfusions, hypertension led to discovery of pheo, resected during that admission, d/c home with mild left leg weakness | No  | N/A  | N/A |
| <b><sup>78</sup>Fabricius 2001</b> | Case series | C/S | Aortic dissection     | 32 year old G1P0 at 39 weeks with C/S for fetal tachycardia, found to have type A dissection with cardiogenic shock                                          | CPB then VA | 4   | None                                                                                                                                                                 | No  | None | No  |
| <b><sup>79</sup>Faerber 2018</b>   | Case report | N/A | PPCM                  | 23 year old with PPCM 1 month after delivery                                                                                                                 | VA          | 2   | PPCM EF 10% and unstable s/p VA ECMO to LVAD on day 2 (HM3) explanted 1 year later                                                                                   | No  | N/A  | N/A |
| <b><sup>80</sup>Fang 2016</b>      | Case report | C/S | Cardiac arrest, AFE   | 35 year old at 36 weeks with C/S c/b PEA requiring CPR (2.5 hours) and transfer to ECMO center, likely AFE                                                   | VA          | 2   | Cardiogenic pulmonary edema, pulmonary hemorrhage, AKI, shock liver, DIC, mild right hand motor weakness                                                             | No  | N/A  | N/A |

|                                |             |     |                                 |                                                                                                                                                     |            |      |                                                                                                                                                                                 |     |                                                         |     |
|--------------------------------|-------------|-----|---------------------------------|-----------------------------------------------------------------------------------------------------------------------------------------------------|------------|------|---------------------------------------------------------------------------------------------------------------------------------------------------------------------------------|-----|---------------------------------------------------------|-----|
| <sup>81</sup> Fayad 2007       | Case report | C/S | Heart disease, cardiac failure  | 31 year old at 30 weeks with post-rheumatic mitral stenosis, dilated RV cannulated less than 1 week postpartum                                      | VA         | 9    | CPB then planned transition to ECMO for 9 days, VAP with pseudomonas then sepsis, died after ECLS decannulation                                                                 | Yes | Preterm delivery at 30 weeks, NICU respiratory support  | N/A |
| <sup>82</sup> Fernandes 2015   | Case report | C/S | PE, cardiac arrest              | 30 year old G1P0 at 37 and 5/7 weeks with cardiac arrest due to PE (got tPa) then CPR for 84 minutes until ECMO was running                         | VA then VV | 4.75 | Intraperitoneal bleeding, DIC, massive transfusion Harlequin syndrome, R arm compartment syndrome after R axillary cannulation requiring fasciotomies; VA 33 hours, VV 81 hours | No  | N/A                                                     | N/A |
| <sup>83</sup> Fernandez 2015   | Case report | N/A | Malignancy, respiratory failure | 24 year old at 22 weeks with infiltrates and effusion, giant cell NSCLC with respiratory failure                                                    | N/A        |      | Refractory hypoxemia in setting of NSCLC                                                                                                                                        | Yes | TAB at 22 weeks                                         | Yes |
| <sup>84</sup> Firstenberg 2010 | Case report | C/S | Septic shock, cardiac failure   | 39 year old multiparous woman with necrotizing GAS soft tissue infection after c/s within 1 week of delivery with cardiomyopathy EF 5% LVAD to ECMO | VA         | 3    | Multiple wound debridements, bleeding,                                                                                                                                          | No  | N/A                                                     | N/A |
| <sup>85</sup> Fuchs 2017       | Case report | C/S | ARDS                            | 18 year old G1P0 at 36 and 2/7 weeks with human metapneumovirus c/b preeclampsia cannulated PPD# 1                                                  | VV         | 5    | None                                                                                                                                                                            | No  | Preterm delivery at 36 weeks, respiratory support, NICU | No  |

|                                            |                      |     |                           |                                                                                                                                                                                   |     |       |                                                                                                                                   |     |                                    |     |
|--------------------------------------------|----------------------|-----|---------------------------|-----------------------------------------------------------------------------------------------------------------------------------------------------------------------------------|-----|-------|-----------------------------------------------------------------------------------------------------------------------------------|-----|------------------------------------|-----|
| <sup>86</sup> Futoran 1975                 | Case series          | C/S | AFE, PPH, cardiac failure | 28 year old G2P2 at 34 weeks with placental abruption s/p C/S, DIC hysterectomy massive transfusion, AFE                                                                          | VA  | 1.125 | Necrotizing bronchopneumonia, renal thrombosis, hemopericardium, hemothorax, brain and adrenal hemorrhage                         | Yes | Stillborn                          | Yes |
| <sup>86</sup> Futoran 1975                 | Case series          | VD  | Trauma, ARDS              | 19 year old G1P0 at 32 weeks with auto accident, multiple injuries ruptured spleen, liver tear, rib fractures, PTX, ARDS, PNA, septicemia cannulated after delivery               | VA  | 14    | Iliac vein thrombosis, renal failure, septicemia                                                                                  | Yes | Died day 2                         | Yes |
| <sup>87</sup> Garcia-Aranda Dominguez 2017 | Retrospective review | C/S | PAH                       | Patient with severe PAH cannulated postpartum                                                                                                                                     | VV  |       |                                                                                                                                   | Yes | N/A                                | N/A |
| <sup>88</sup> Gattinoni 1980               | Case series          | C/S | ARDS                      | 25 year old at 20 weeks with aplastic anemia, fetal demise s/p laparotomy, white out and ARDS                                                                                     | N/A | 1.625 | Pseudomonas peritonitis, septic shock 14 days after bypass                                                                        | Yes | SAB at 20 weeks                    | Yes |
| <sup>89</sup> Gauzere 2011                 | Retrospective review | C/S | ARDS                      | 2 patients with H1N1 ARDS in third trimester                                                                                                                                      | N/A |       | Both died                                                                                                                         | 2/2 | N/A                                | N/A |
| <sup>90</sup> Gevaert 2011                 | Case series          | C/S | PPCM                      | 28 year old G3P1 with PPCM presented at 38 weeks, decompensated into cardiogenic shock with IABP placement c/b stillbirth via c/s, bedside ECMO cannulation and LVAD after 7 days | VA  | 7     | VAP, bleeding at site of ECMO aortic cannula on day 1, d/c to home 37 days after admission and heart transplant 78 days post-LVAD | No  | SAB at 38 weeks                    | Yes |
| <sup>91</sup> Gijs 2018                    | Case report          | C/S | ARDS                      | 30 year old at 26 weeks with ARDS Influenza A c/b hypoxemia, seizure, intracerebral hemorrhage                                                                                    | VV  | 12    | Microbleeds in brain, seizure                                                                                                     | No  | Preterm delivery at 26 weeks, NICU | No  |

|                                   |                                   |     |                                      |                                                                                                                                                                                                |                        |     |                                                                                                                      |     |                                                                                   |     |
|-----------------------------------|-----------------------------------|-----|--------------------------------------|------------------------------------------------------------------------------------------------------------------------------------------------------------------------------------------------|------------------------|-----|----------------------------------------------------------------------------------------------------------------------|-----|-----------------------------------------------------------------------------------|-----|
| <sup>92</sup> Goto 2017           | Case series                       | C/S | Cardiac arrest                       | 29 year old G1P0 at 36 weeks arrested in ambulance, CPR, perimortem cesarean delivery after 21 min, VA ECMO                                                                                    | VA                     | 9   | DIC, coagulopathy, emergent hysterectomy, massive transfusion                                                        | No  | Preterm delivery at 36 weeks                                                      | No  |
| <sup>93</sup> Grasselli 2012      | Case report and literature review | VD  | ARDS                                 | 25 year old G1P0 at 27 weeks with H1N1 ARDS, later delivered at term after recovery from H1N1 ARDS                                                                                             | VV                     | 13  | None reported                                                                                                        | No  | None                                                                              | No  |
| <sup>94</sup> Greenberg 1995      | Case report                       | VD  | ARDS                                 | 21 year old G1P0 delivered at 26 weeks with bacterial sepsis with staph aureus c/b arrhythmia, ARDS, multiorgan dysfunction cannulated within 1 month postpartum                               | ECCO <sub>2</sub> (VV) | 28  | Bacterial sepsis c/b arrhythmia, ARDS, DIC, ischemic digits                                                          | No  | Preterm delivery, RDS, IVH, spastic quadriplegia, developmental delay             | No  |
| <sup>95</sup> Grimme 2012         | Case report                       | VD  | Pulmonary hemorrhage, cardiac arrest | 23 year old at 19 weeks with pulmonary hemorrhage c/b PEA s/p CPR 45 minutes until cannulation                                                                                                 | VV                     | 5   | Hemothorax, tracheostomy, subsequent massive pulmonary hemorrhage                                                    | No  | TAB bilateral ventriculomegaly, cerebral ischemia, counted toward fetal mortality | Yes |
| <sup>96</sup> Guenther 2015       | Case report                       | C/S | AFE, cardiac arrest                  | 43 year old G4P2 with AFE with cardiac arrest, PPH s/p hysterectomy, mobile ECLS called, CPR                                                                                                   | VA                     | 2.5 | Intraperitoneal bleeding, re-laparotomy, renal failure, R hemiparesis, PEG, trach, d/c to rehab, neurologic deficits | No  | N/A                                                                               | No  |
| <sup>97</sup> Guillaume 2013      | Retrospective study               | N/A | AFE                                  | 2 patients with AFE                                                                                                                                                                            | VV                     |     |                                                                                                                      | 2/2 |                                                                                   | N/A |
| <sup>98</sup> Halldorsdottir 2016 | Case report                       | C/S | Cardiac failure, heart disease       | 29 year old G3P1 delivered at 37 weeks with cardiogenic shock post C/S with severe hypoxemia, cannulated 2 hours after delivery due to MV prosthesis thrombosis subsequently repaired on PPD#3 | VA                     | 3   | Weaned from CPB after MV replacement                                                                                 | No  | None                                                                              | No  |

|                             |             |     |                                        |                                                                                                                                                                                                    |    |         |                                                                                                                                                                            |     |                                              |     |
|-----------------------------|-------------|-----|----------------------------------------|----------------------------------------------------------------------------------------------------------------------------------------------------------------------------------------------------|----|---------|----------------------------------------------------------------------------------------------------------------------------------------------------------------------------|-----|----------------------------------------------|-----|
| <sup>99</sup> Hamdan 2017   | Case series | N/A | PPCM                                   | 25 year old with PPCM EF 15-20%, VA ECMO to LVAD within 3 weeks postpartum                                                                                                                         | VA | 4       | None                                                                                                                                                                       | No  | N/A                                          | N/A |
| <sup>100</sup> Hansen 2012  | Case report | N/A | Heart disease, cardiac failure, sepsis | 38 year old with septic shock for retained POC, D&C before IABP and then VA ECMO, then papillary muscle rupture, 2 days ECMO before MV replacement                                                 | VA | 2       | Severe AI went back to OR on POD9                                                                                                                                          | No  | N/A                                          | N/A |
| <sup>101</sup> Hara 2017    | Case report | C/S | PAH                                    | 32 year old G2P1 delivered at 37 weeks with PAH with c/s c/b acute RV failure after delivery requiring cannulation                                                                                 | VA | 2       | None                                                                                                                                                                       | No  | Normal APGARs                                | No  |
| <sup>102</sup> Herrero 2018 | Case series | C/S | PAH                                    | 30 year old G4P3 delivered at 32 and 4/7 weeks with group 1 PAH during pregnancy, worsening heart failure s/p c/s under general anesthesia c/b severe R sided failure cannulated 7 days postpartum | VA | 9       |                                                                                                                                                                            | Yes | Preterm delivery at 32 weeks, NICU admission | N/A |
| <sup>103</sup> Hill 1974    | Case series | N/A | AFE, cardiac failure                   | 26 year old with AFE                                                                                                                                                                               | VA | 1.125   | Massive DIC, septicemia                                                                                                                                                    | Yes |                                              | N/A |
| <sup>104</sup> Ho 2009      | Case report | C/S | AFE, cardiac arrest                    | 33 year old G4P2 delivered at 38 weeks with placenta previa with bleeding went to emergency C/S for chest tightness, fetal bradycardia c/f AFE, PEA arrest underwent CPR and ECMO cannulation      | VA | 0.16667 | Placenta previa/accreta and AFE c/b bleeding requiring hysterectomy, ECMO for 4 hours then ICU stay c/b ARDS and L sided weakness likely from ischemic event, d/c to rehab | No  | None                                         | No  |

|                                 |                                   |     |                      |                                                                                                                                                  |     |         |                                                                  |     |                                                 |     |
|---------------------------------|-----------------------------------|-----|----------------------|--------------------------------------------------------------------------------------------------------------------------------------------------|-----|---------|------------------------------------------------------------------|-----|-------------------------------------------------|-----|
| <sup>105</sup> Ho 2014          | Case report                       | C/S | PE, cardiac arrest   | 37 year old G2P1 delivered at 37 and 2/7 weeks with PEA arrest CPR for 10 minutes, VA ECMO found PE and underwent catheter directed thrombectomy | VA  | 6       | Hemoperitoneum , need for UAE, no long term sequelae             | No  | N/A                                             | N/A |
| <sup>106</sup> Holzgrae fe 2010 | Observational study               | N/A | ARDS                 | 3 pregnant patients with H1N1 ARDS                                                                                                               | N/A |         | N/A                                                              | No  | 1 baby died after 18 days of mom ECMO treatment | 1/3 |
| <sup>107</sup> Hou 2012         | Case series                       | N/A |                      | 4 patients with H1N1 ARDS; 2 antepartum, 2 postpartum                                                                                            | VV  |         |                                                                  | 2/4 |                                                 | N/A |
| <sup>108</sup> Hsieh 2000       | Case report                       | C/S | AFE, cardiac arrest  | 34 year old G7P3 with AFE on floor, emergency C/S, cardiac arrest with CPR, DIC, RV failure                                                      | VA  | 1.66667 | DIC, massive transfusion, discharged home 24 days after delivery | No  | N/A                                             | N/A |
| <sup>109</sup> Huang 2017       | Retrospective observational study | N/A |                      | PPH (uterine atony for 4, AFE for 1), average time 32.6 +/- 18.8 hours                                                                           | N/A |         | 2 patients with official ECMO related bleeding complications     |     | Median gestational age 37 weeks +/- 2.2 days    | No  |
| <sup>109</sup> Huang 2017       | Retrospective observational study | C/S | AFE, cardiac arrest  | 39 year old G3P1 delivered at 34 weeks with twin pregnancy c/b previa with cesarean c/b cardiac arrest with 34 min CPR suspected AFE             | VA  | 2       | TAE, central hypothermia                                         | No  | Preterm delivery of twins at 34 weeks           | No  |
| <sup>109</sup> Huang 2017       | Retrospective observational study | VD  | PPH, cardiac arrest  | 41 year old G4P2 delivered at 39 weeks with PPH due to uterine atony, required CPR for 18 min, Postpartum 1h                                     | VA  | 2.5     | Subtotal hysterectomy, ex-lap internal bleeding                  | No  | N/A                                             | N/A |
| <sup>109</sup> Huang 2017       | Retrospective observational study | VD  | PPH                  | 34 year old G1P1 delivered at 39 weeks with PPH due to uterine atony, DIC, Postpartum 1h                                                         | VA  | 0.41667 | TAE                                                              | Yes | N/A                                             | N/A |
| <sup>109</sup> Huang 2017       | Retrospective observational study | VD  | PPH, cardiac failure | 33 year old G1P1 delivered at 38 weeks with PPH due to uterine atony, cardiomyopathy EF <35%. Postpartum 2h                                      | VA  | 4.75    | Subtotal hysterectomy, 18 hours VA ECMO then LVAD x 4 days       | No  | N/A                                             | N/A |



|                                   |                                    |     |                                      |                                                                                                                                                                            |            |    |                                                                                                                           |     |                                    |     |
|-----------------------------------|------------------------------------|-----|--------------------------------------|----------------------------------------------------------------------------------------------------------------------------------------------------------------------------|------------|----|---------------------------------------------------------------------------------------------------------------------------|-----|------------------------------------|-----|
| <b><sup>109</sup>Huang 2017</b>   | Retrospective observational study  | C/S | PPH, cardiac arrest                  | 34 year old G2P1 delivered at 39 weeks with PPH after c/s due to uterine atony, DIC, TRALI, abruption, required CPR for 1 min, Postpartum 4h                               | VA, VV     | 2  | TAE, Bakri, massive transfusion, VA 10 hours, VV 33 hours                                                                 | No  | N/A                                | N/A |
| <b><sup>110</sup>Huang 2017</b>   | Case report                        | N/A | Malignancy , respiratory failure     | 38 year old at 16 weeks with mediastinal mass, lymphoma c/b high airway pressures VV then PEA and VA ECMO                                                                  | VV then VA |    | VV then PEA so VA, ECMO duration of days                                                                                  | No  | N/A                                | N/A |
| <b><sup>111</sup>Hur 2011</b>     | Case report                        | N/A | ARDS                                 | 29 year old at 32 and 4/7 weeks with H1N1 ARDS                                                                                                                             | N/A        |    | Died                                                                                                                      | Yes | N/A                                | N/A |
| <b><sup>112</sup>Imaeda 2016</b>  | Case report                        | N/A | Septic shock, cardiac failure        | 24 year old multiparous woman delivered at 32 weeks with septic shock due to GAS with severe cardiomyopathy EF 10%                                                         | VA         | 7  | Renal failure                                                                                                             | No  | N/A                                | No  |
| <b><sup>113</sup>Isbir 2014</b>   | Case report                        | N/A | PPCM, cardiac arrest                 | 29 year old delivered at 31 weeks with PPCM EF 25%, sternotomy for concert for aortic dissection, IABP, cardiac arrest, VA ECMO in OR                                      | VA         | 2  | None                                                                                                                      | No  | Preterm delivery at 31 weeks, NICU | No  |
| <b><sup>114</sup>Itagaki 2014</b> | Case report                        | VD  | PPH, cardiac arrest, cardiac failure | 25 year old G2P2 delivered at 41 weeks with PPH, DIC prior to ECMO, Vfib arrest s/p shock recovered from DIC but PPD# 2 severe LV failure with hypoxic respiratory failure | VA         | 3  | Required transfusions but no major bleeding, discharged from ICU day 10                                                   | No  | N/A                                | N/A |
| <b><sup>115</sup>Ius 2015</b>     | Single center retrospective review | C/S | ARDS                                 | 31 year old G2P2 with respiratory failure requiring urgent c/s cannulated PPD# 1                                                                                           | VV         | 13 | Intraabdominal bleeding following c/s requiring repeat laparotomies, dialysis, tracheostomy, died 3 weeks after ECMO wean | Yes | Unclear                            | N/A |

|                          |                                   |     |                                |                                                                                                                              |                        |         |                                                                               |    |                                         |     |
|--------------------------|-----------------------------------|-----|--------------------------------|------------------------------------------------------------------------------------------------------------------------------|------------------------|---------|-------------------------------------------------------------------------------|----|-----------------------------------------|-----|
| <b>116Jacquens 2017</b>  | Retrospective observational study | N/A | ARDS                           | 6 patients with ARDS in national database                                                                                    | N/A                    |         |                                                                               | No |                                         | N/A |
| <b>117Jais 2012</b>      | Case series                       | N/A | PAH                            | Patient case within series of patients with PAH; delivered then had RV failure requiring ECLS then heart/lung transplant     | VA                     |         | N/A                                                                           | No | N/A                                     | N/A |
| <b>118Jandhyala 1994</b> | Case report                       | VD  | ARDS                           | 20 year old G3P1 at 30 weeks with ARDS secondary to e.coli urosepsis with refractory hypoxemia for ECCO <sub>2</sub> removal | ECCO <sub>2</sub> (VV) | 1.83333 | None                                                                          | No | Preterm delivery at 30 weeks, NICU      | No  |
| <b>119Janssen 2006</b>   | Case report                       | C/S | ARDS                           | 36 year old G5P4 at 31 weeks with ARDS with multiorgan dysfunction from chlamydia psittaci, cannulated after delivery        | PECLA (VV)             |         | Renal failure, relaparotomy on POD2                                           | No | Preterm delivery at 31 weeks, RDS, NICU | No  |
| <b>120Jo 2011</b>        | Case report                       | C/S | PPCM                           | 37 year old G4P0 at 37 weeks with PPCM with apical ballooning within 2 hours post C/S                                        | VA                     | 8       | None                                                                          | No | N/A                                     | N/A |
| <b>121John 2012</b>      | Case report                       | C/S | Cardiac failure, heart disease | Presented with SOB, hypoxemia with refractory pulmonary edema from rheumatic valvular heart disease                          | VV                     | 7       | None                                                                          | No | None                                    | No  |
| <b>122Ju 2018</b>        | Case series                       | C/S | Septic shock, ARDS             | 36 year old G2P1 at 21 weeks with twin pregnancy c/b chorioamnionitis, septic shock                                          | VV                     | 9       | Fingertip amputation due to ischemia                                          | No | TAB, twins                              | 2/2 |
| <b>122Ju 2018</b>        | Case series                       | VD  | PPH, cardiac failure           | 37 year old G2P1 with uterine atony, PPH, cardiac dysfunction                                                                | VA                     | 6       | Hysterectomy, ligation of internal iliacs, DIC, massive transfusion, hematoma | No | N/A                                     | No  |
| <b>122Ju 2018</b>        | Case series                       | C/S | Cardiac arrest                 | 30 year old G2P1 at 38 weeks with cardiotoxicity due to epidural, ECPR                                                       | VA then VV             | 13      | Intraabdominal hematoma requiring washout                                     | No | N/A                                     | No  |
| <b>122Ju 2018</b>        | Case series                       | C/S | AFE, cardiac failure           | 38 year old G2P2 with cardiogenic shock due to AFE                                                                           | VA then VV             | 10      | Hematoma, cognitive dysfunction                                               | No | N/A                                     | No  |

|                                           |             |     |                                      |                                                                                                                                                                                                                           |     |         |                                                                                   |     |                                    |                          |
|-------------------------------------------|-------------|-----|--------------------------------------|---------------------------------------------------------------------------------------------------------------------------------------------------------------------------------------------------------------------------|-----|---------|-----------------------------------------------------------------------------------|-----|------------------------------------|--------------------------|
| <sup>123</sup> <b>Kapoor 2012</b>         | Case report | D&E | PAH, cardiac failure, cardiac arrest | 39 year old G2P1 at 22 weeks with PAH and RV failure, planned D&E but post-procedure decompensated, PEA and went on VA support                                                                                            | VA  |         | Underwent heart-lung transplant                                                   | No  | TAB at 22 weeks (prior to ECLS)    | Not counted as mortality |
| <sup>124</sup> <b>Kaliyev 2015</b>        | Case report | N/A | ARDS                                 | 28 year old at 26 weeks with severe ARDS                                                                                                                                                                                  | VV  | 10      | Blood transfusions                                                                | No  | None                               | No                       |
| <sup>125</sup> <b>King 2000</b>           | Case report | VD  | Asthma, ARDS                         | 29 year old at 25 weeks with asthma, PNA with ARDS with severe hypoxemia                                                                                                                                                  | VV  | 2.5     | None                                                                              | No  | Preterm delivery at 31 weeks, NICU | No                       |
| <sup>126</sup> <b>Kinni 2018</b>          | Case report | N/A | Diffuse alveolar hemorrhage          | 20 year old at 24 weeks with hemoptysis, diffuse alveolar hemorrhage, microscopic hemangiomas                                                                                                                             | VV  |         | Worsening RV failure after VV, anatomical limitations to VA, pulmonary hemorrhage | Yes | N/A                                | N/A                      |
| <sup>127</sup> <b>Knapp 2016</b>          | Case report | C/S | SCAD, cardiac failure                | 30 year old patient 16 days postpartum with SCAD s/p multiple stents s/p CABG SVGs to LAD and circumflex                                                                                                                  | VA  | 4       | Post CABG BiV dysfunction EF 25% and moderate RV dysfunction                      | No  | N/A                                | N/A                      |
| <sup>128</sup> <b>Ko 1998</b>             | Case report | C/S | PPH, cardiac failure                 | 37 year old G5P3 at 35 and 2/7 weeks with twins, placenta increta with bleeding and atony s/p UA ligation, methergine induced coronary vasospasm and pulmonary edema, LV EF 44% and arrhythmias on POD1 c/f postpartum MI | VA  | 4.16667 | None                                                                              | No  | N/A                                | N/A                      |
| <sup>129</sup> <b>Konstantinidis 2015</b> | Case report | N/A | PAH, cardiac failure                 | 35 year old at 37 weeks with idiopathic PAH with planned ECMO cannulation, unclear delivery but immediately after decompensated and was started on ECMO, BiV failure with RV pressure/volume overload                     | N/A | 3       | None                                                                              | No  | N/A                                | N/A                      |

|                               |             |     |                                       |                                                                                                                                                                                                                                      |          |      |                                                                                                               |     |                                                         |     |
|-------------------------------|-------------|-----|---------------------------------------|--------------------------------------------------------------------------------------------------------------------------------------------------------------------------------------------------------------------------------------|----------|------|---------------------------------------------------------------------------------------------------------------|-----|---------------------------------------------------------|-----|
| <sup>130</sup> Kuan-Ying 2017 | Case series | N/A | PPH (3), AFE (1), PE (1)              | 5 patients; average age 36.8 +/- 3.9 years; average GA 36.98 +/- 2.6 weeks; PPH (3), AFE+PPH (1), PE (1); average 30+/-19.7 hours                                                                                                    | VA       | 1.25 | L hemiplegia in 1 patient                                                                                     | 4/5 | N/A                                                     | 5/5 |
| <sup>131</sup> Kumar 2012     | Case report | C/S | PPCM                                  | 32 year old G3 at 37 weeks with history of preeclampsia, mild peripartum pulmonary edema leading to C/S, progressive dyspnea, found to have EF10% and biventricular failure --> IABP without improvement --> BiVAD and ECMO on PPD#5 | N/A      | 5    | None                                                                                                          | No  | Twins                                                   | N/A |
| <sup>132</sup> Krumnik I 2006 | Case report | C/S | PPH, cardiac arrest, cardiac failure  | 39 year old woman with uterine atony and PPH treated with prostaglandins, cardiac arrest s/p CPR, EF <45%                                                                                                                            | VA       | 1.5  | Myoclonic epilepsy, small visual field deficits                                                               | No  | N/A                                                     | No  |
| <sup>133</sup> Kunstyr 2010   | Case report | VD  | ARDS                                  | 28 year old at 24 weeks with H1N1 influenza A ARDS                                                                                                                                                                                   | VV       | 14   | Hemorrhagic bronchitis, cephalic vein thrombosis, pseudomonas infection                                       | No  | Preterm delivery at 24 weeks, NICU, respiratory support | No  |
| <sup>134</sup> Kutlesa 2011   | Case series | VD  | ARDS                                  | 23 year old at 24 weeks with H1N1 ARDS                                                                                                                                                                                               | VV       | 16   | Fetal death, hyperbilirubinemia, severe tracheal hemorrhage                                                   | Yes | Fetal death, ischemia                                   | Yes |
| <sup>135</sup> Law 2013       | Case series | C/S | PPCM, Takotsubo, cardiac arrest, pheo | 23 year old at 32 weeks with severe HTN, cardiac arrest c/b CPR, VT, shock, LVEF of 5% to ECMO                                                                                                                                       | VA       | 1    | Myocarditis EF5% increased by day 4 to 25-30% (Takotsubo)                                                     | No  | Preterm delivery at 32 weeks, NICU admission            | N/A |
| <sup>136</sup> Lee 1997       | Case series | VD  | ARDS                                  | 26 year old woman at 17 weeks with varicella PNA c/b ARDS                                                                                                                                                                            | VA to VV | 57   | Cannula dislodgment, bilateral tension hemopneumothoraces, bronchopleural fistulas, multiple explorations for | Yes | SAB at 21 weeks                                         | Yes |

|                               |             |     |                                            |                                                                                                                                                                                                                                                  |     |    |                                                                                                  |     |                                                      |                          |
|-------------------------------|-------------|-----|--------------------------------------------|--------------------------------------------------------------------------------------------------------------------------------------------------------------------------------------------------------------------------------------------------|-----|----|--------------------------------------------------------------------------------------------------|-----|------------------------------------------------------|--------------------------|
|                               |             |     |                                            |                                                                                                                                                                                                                                                  |     |    | bleeding, R heart failure, hepatic abscesses                                                     |     |                                                      |                          |
| <sup>136</sup> Lee 1997       | Case series | VD  | ARDS                                       | 33 year old woman with varicella PNA c/b ARDS, cannulated PPD#3                                                                                                                                                                                  | VV  | 11 | Staph PNA and renal insufficiency                                                                | No  | N/A                                                  | N/A                      |
| <sup>137</sup> Lee 2008       | Case report | C/S | PPH, TRALI                                 | 22 year old G3P2 at 40 weeks with PPH requiring multiple transfusions, TRALI with pulmonary edema                                                                                                                                                | VA  | 3  | None, discharged POD 33                                                                          | No  | N/A                                                  | N/A                      |
| <sup>138</sup> Legrand 2013   | Case series | VD  | AFE                                        | 26 year old G2P1 with operative vaginal delivery with forceps at term, AFE                                                                                                                                                                       | VA  | 1  | Hemorrhage, atony, AFE c/b PEA s/p hypogastric artery embolization, hysterectomy, RV dysfunction | Yes | N/A                                                  | N/A                      |
| <sup>139</sup> Lemaire 2017   | Case series | N/A | Hemorrhage, cardiac arrest                 | 30 year old at 32 weeks with splenic artery pseudoaneurysm rupture with hemoperitoneum, massive blood loss s/p coil embolization, return to OR for abdominal hemorrhage, cardiac arrest/pulmonary edema then ECMO, died hours later              | N/A |    | Multiple organ failure, DIC                                                                      | Yes | IUFD prior to ECLS - not counted in infant mortality | Not counted as mortality |
| <sup>140</sup> Lembrikov 2019 | Case report | VD  | Cardiac failure, Takotsubo, cardiac arrest | 27 year old G2P0 at 40 and 6/7 weeks with vaginal delivery c/b manual removal placenta, PPH, atony, biventricular dysfunction requiring laparotomy/hysterectomy and intermittent CPR requiring ECMO support eventually regained function and d/c | VA  | 5  | Post-operative IABP support; no neuro or cognitive deficit                                       | No  | N/A                                                  | N/A                      |

|                                   |             |     |                                  |                                                                                                                                                 |    |    |                                                                                                                              |    |                                                        |                          |
|-----------------------------------|-------------|-----|----------------------------------|-------------------------------------------------------------------------------------------------------------------------------------------------|----|----|------------------------------------------------------------------------------------------------------------------------------|----|--------------------------------------------------------|--------------------------|
| <b><sup>141</sup>Li 2013</b>      | Case report | C/S | ARDS                             | 28 year old G1P0 at 33 weeks with H1N1 ARDS c/b refractory hypoxemia, stat C/S then ECMO                                                        | VV | 6  | Staphylococcus hominis catheter infection                                                                                    | No | Preterm delivery at 33 weeks, NICU admission           | No                       |
| <b><sup>142</sup>Liu 2018</b>     | Case report | VD  | ARDS                             | 25 year old G2P1 at 24 weeks with H1N1 ARDS c/b fetal death on ECMO and vaginal delivery                                                        | VV | 6  | IUFD, vaginal bleeding, uterine contractions, IOL and VD, weaned from mechanical ventilation                                 | No | IUFD at 24 weeks                                       | Yes                      |
| <b><sup>143</sup>Loizos 2017</b>  | Case report | N/A | Cardiac failure, pheo, Takotsubo | 21 year old woman with pheochromocytoma, went for surgical termination of pregnancy, had HTN/bradycardia and pulmonary edema and then Takotsubo | VA | 7  | LV dysfunction EF 10-15%, discharged 7 days later                                                                            | No | TAB - not counted for fetal mortality                  | Not counted as mortality |
| <b><sup>144</sup>Lueck 2016</b>   | Case series | C/S | PPCM                             | 34 year old G1P0 at 35 weeks with PPCM with hemodynamic shock, was on 10 days of ECLS prior to LVAD, eventually LVAD weaned after 612 days      | VA | 10 | None                                                                                                                         | No | N/A                                                    | N/A                      |
| <b><sup>145</sup>Lund 2011</b>    | Case report | VD  | PPCM                             | 37 year old G2P2 presented in acute CHF 8 days after delivery, intubated, EF 5-10% on ECMO for 4 days then LVAD                                 | VA | 4  | N/A                                                                                                                          | No | N/A                                                    | N/A                      |
| <b><sup>146</sup>Lysenko 2014</b> | Case report | C/S | ARDS                             | 24 year old G1P0 at 39 and 3/7 weeks with H1N1 ARDS, C/S at 30w3d                                                                               | VV | 17 | None                                                                                                                         | No | Preterm delivery at 30 week, intubated, NICU admission | No                       |
| <b><sup>147</sup>Marino 2018</b>  | Case report | C/S | PPH, AFE, cardiac arrest, PPCM   | 34 year old G2P1 at 38 weeks with cardiac arrest, uterine atony, DIC c/b PEA, AFE, LV EF 8%, VA ECMO with Impella                               | VA | 7  | PPH with DIC, bilateral UAE, abdominal hemorrhage, renal failure, multiple laparotomies for bleeding and massive transfusion | No | N/A                                                    | N/A                      |

|                                      |                                 |     |                       |                                                                                                                                                                                       |            |    |                                                                                                                                                                             |     |                                                         |     |
|--------------------------------------|---------------------------------|-----|-----------------------|---------------------------------------------------------------------------------------------------------------------------------------------------------------------------------------|------------|----|-----------------------------------------------------------------------------------------------------------------------------------------------------------------------------|-----|---------------------------------------------------------|-----|
| <sup>148</sup> <b>McDonald 2017</b>  | Case report                     | C/S | PE, cardiac arrest    | 22 year old at 36 weeks with PE c/b emergency C/S c/b instability with CPR for 65 min before ECMO cannulation                                                                         | VA         | 5  | Bleeding, bilateral UAE, ex-lap; arm compartment syndrome s/p fasciotomy, sepsis, re-ex-lap for bleeding, persistent R foot drop and R upper extremity flexion on discharge | No  | Preterm delivery at 36 weeks, acidotic, did not survive | Yes |
| <sup>149</sup> <b>McKechnie 2001</b> | Case report                     | C/S | SCAD, cardiac failure | Patient at 36 weeks with SCAD, p/w chest pain developed seizure and hemodynamic collapse, emergency C/S with CPR, shocks then ECMO with EF <10%, had angioplasty with 6 stents placed | VA         | 3  | No complications                                                                                                                                                            | No  | None                                                    | No  |
| <sup>150</sup> <b>McNamee 2010</b>   | Case report                     | C/S | ARDS                  | 21 year old G2P1 at 33 weeks with H1N1 complicated by PTX, hypoxia requiring ECMO on PPD#5, pulmonary hemorrhage requiring R middle lobectomy c/b bronchopleural fistula              | VA         | 28 | Pulmonary hemorrhage, generalized myopathy, neuro-rehabilitation                                                                                                            | No  | None                                                    | No  |
| <sup>151</sup> <b>Mendes 2012</b>    | Case report                     | N/A | ARDS                  | 42 year old woman with H1N1 ARDS 2 weeks postpartum                                                                                                                                   | VV         | 7  | None                                                                                                                                                                        | No  | N/A                                                     | N/A |
| <sup>23</sup> <b>Meng 2017</b>       | Retrospective review, 4 centers | C/S | PAH                   | Patient at 31 weeks with PAH due to CHD or VSD/Eisenmenger cannulated PPD#4                                                                                                           | VA         |    | N/A                                                                                                                                                                         | Yes | Preterm delivery at 31 weeks, NICU admission            | No  |
| <sup>23</sup> <b>Meng 2017</b>       | Retrospective review, 4 centers | C/S | PAH                   | Patient at 34 weeks with PAH due to CHD or VSD/Eisenmenger cannulated PPD#3                                                                                                           | VV then VA | 13 | VV 2d then VA 11d                                                                                                                                                           | Yes | Preterm delivery at 34 weeks                            | No  |

|                                       |                                 |     |                                 |                                                                                                                                                               |            |    |                                                                                                                                                                                                                 |     |                              |     |
|---------------------------------------|---------------------------------|-----|---------------------------------|---------------------------------------------------------------------------------------------------------------------------------------------------------------|------------|----|-----------------------------------------------------------------------------------------------------------------------------------------------------------------------------------------------------------------|-----|------------------------------|-----|
| <b><sup>23</sup>Meng<br/>2017</b>     | Retrospective review, 4 centers | C/S | PAH                             | Patient at 35 weeks with PAH due to CHD or VSD/Eisenmenger, cannulated 2 days before delivery                                                                 | VV then VA | 21 | Discharged home on PPD24 found dead at home on PPD89 - ultimately died but not while on ECMO, VV 15d then VA 6d                                                                                                 | No  | Preterm delivery at 35 weeks | No  |
| <b><sup>23</sup>Meng<br/>2017</b>     | Retrospective review, 4 centers | D&E | PAH                             | Patient at 13 weeks with idiopathic PAH                                                                                                                       | N/A        |    | N/A                                                                                                                                                                                                             | Yes |                              | Yes |
| <b><sup>23</sup>Meng<br/>2017</b>     | Retrospective review, 4 centers | D&E | PAH                             | Patient at 21 weeks with scleroderma, pulmonary HTN cannulated PPD#8                                                                                          | VA         |    | N/A                                                                                                                                                                                                             | Yes |                              | Yes |
| <b><sup>23</sup>Meng<br/>2017</b>     | Retrospective review, 4 centers | C/S | PAH, cardiac arrest, malignancy | Patient at 34 weeks with thrombotic disease from cancer, PEA arrest cannulated PPD#1                                                                          | VA         |    | N/A                                                                                                                                                                                                             | Yes | Preterm delivery at 34 weeks | No  |
| <b><sup>152</sup>Meng<br/>2018</b>    | Case report                     | D&E | Heart disease, cardiac failure  | 21 year old G1P0 at 22 weeks with Eisenmenger syndrome, VSD underwent planned D&E at 21 weeks for maternal risk c/b post-procedure respiratory decompensation | VV         | 3  | Upper extremity DVT POD 8, discharged on POD35                                                                                                                                                                  | No  | D&E                          | Yes |
| <b><sup>153</sup>Miessau<br/>2015</b> | Case report                     | VD  | PPCM                            | 22 year old with severe cardiomyopathy EF <10% bridge to decision cannulated PPD 14                                                                           | VA then VV | 22 | Dialysis, MARS for shock liver, severe respiratory failure after TAH, tracheostomy; underwent OHT 103 days after TAH implantation; VA unclear, VV 12 days then rescue 10 days (22 days of VV support after TAH) | No  | N/A                          | No  |



|                                      |                                   |                               |                              |                                                                                                                                                                        |     |         |                                                                                                                                |    |                                                                                |     |
|--------------------------------------|-----------------------------------|-------------------------------|------------------------------|------------------------------------------------------------------------------------------------------------------------------------------------------------------------|-----|---------|--------------------------------------------------------------------------------------------------------------------------------|----|--------------------------------------------------------------------------------|-----|
| <sup>154</sup> <b>Mikami 2018</b>    | Case report                       | C/S                           | PPCM                         | 38 year old G3P2 at 35 and 6/7 weeks with PPCM EF10% given IABP and ECMO prior to C/S                                                                                  | VA  | 8       | Uterine bleeding s/p Bakri, TAE, hysterectomy                                                                                  | No | Preterm delivery at 35 weeks, neonatal asphyxia, therapeutic hypothermia, NICU | No  |
| <sup>155</sup> <b>Mita 2017</b>      | Case report                       | C/S                           | Cardiac arrest, pheo         | 29 year old G4P1 at 37 weeks with C/S complicated by hemodynamic collapse, concern for AFE admitted to ICU, PEA with CPR then IABP+ECMO found to have pheochromocytoma | VA  | 6       | DIC, renal failure, rhabdomyolysis; pheo resected on POD70, left ICU and discharged 142 days postpartum no neurologic deficits | No | N/A                                                                            | N/A |
| <sup>7</sup> <b>Moore 2016</b>       | Case report, Systematic review    | N/A                           | ARDS, cardiac failure        | 25 year old G2P1 at 18 weeks with hantavirus cardiopulmonary syndrome                                                                                                  | VA  | 3       | Bleeding requiring transfusion                                                                                                 | No | Preterm delivery at 35 weeks                                                   | No  |
| <sup>156</sup> <b>Morsolini 2017</b> | Case series                       | C/S                           | PAH                          | Patient with PAH                                                                                                                                                       | VA  | 1.08333 | SVC and PA thrombosis                                                                                                          | No | Preterm delivery                                                               | No  |
| <sup>156</sup> <b>Morsolini 2017</b> | Case series                       | C/S                           | ARDS                         | Patient with H1N1                                                                                                                                                      | VV  | 31      | Gastrointestinal bleeding, fetal IVH                                                                                           | No | Preterm delivery, IVH, discharged                                              | No  |
| <sup>156</sup> <b>Morsolini 2017</b> | Case series                       | C/S                           | Heart disease, heart failure | Patient with mitral prosthesis thrombosis                                                                                                                              | VA  | 1.5     | PNA                                                                                                                            | No | Preterm delivery                                                               | No  |
| <sup>156</sup> <b>Morsolini 2017</b> | Case series                       | C/S                           | PAH                          | Patient with PAH                                                                                                                                                       | VA  | 0.91667 | Uterine bleeding, discharged POD22                                                                                             | No | Preterm delivery                                                               | No  |
| <sup>157</sup> <b>Nair 2011</b>      | Retrospective observational study | VD (5)<br>VAVD (2)<br>C/S (5) |                              | 5 spontaneous, 2 VAVD and 5 C/S (3 after ECMO, 1 after ECMO started, 1 prior to ECMO), all postpartum patients were within 1 week of delivery                          | N/A |         |                                                                                                                                |    | Preterm birth average 31 weeks                                                 |     |
| <sup>157</sup> <b>Nair 2011</b>      | Retrospective observational study |                               | ARDS                         | 34 year old at 26 weeks with H1N1 ARDS cannulated antepartum                                                                                                           | VV  | 18      |                                                                                                                                | No | N/A                                                                            | No  |
| <sup>157</sup> <b>Nair 2011</b>      | Retrospective observational study |                               | ARDS                         | 22 year old at 13 weeks with H1N1 ARDS cannulated antepartum                                                                                                           | VV  | 2       |                                                                                                                                | No | N/A                                                                            | No  |

|                     |                                   |    |                      |                                                                        |            |    |                                                                    |     |           |     |
|---------------------|-----------------------------------|----|----------------------|------------------------------------------------------------------------|------------|----|--------------------------------------------------------------------|-----|-----------|-----|
| <b>157Nair 2011</b> | Retrospective observational study |    | ARDS                 | 23 year old at 21 weeks with H1N1 ARDS cannulated antepartum           | VV         | 11 |                                                                    | No  | N/A       | No  |
| <b>157Nair 2011</b> | Retrospective observational study |    | ARDS                 | 33 year old at 23 weeks with H1N1 ARDS cannulated antepartum           | VV         | 5  | Uterine bleeding                                                   | No  | Stillborn | Yes |
| <b>157Nair 2011</b> | Retrospective observational study |    | ARDS                 | 42 year old at 20 weeks with H1N1 ARDS cannulated antepartum           | VV         | 20 | Pulmonary bleeding                                                 | No  | Stillborn | Yes |
| <b>157Nair 2011</b> | Retrospective observational study |    | ARDS                 | 39 year old at 26 weeks with H1N1 ARDS <1 day cannulated antepartum    | VV         |    | Multiple bleeding sites                                            | Yes | N/A       | No  |
| <b>157Nair 2011</b> | Retrospective observational study |    | ARDS                 | 29 year old at 30 weeks with H1N1 ARDS cannulated antepartum           | VV         | 20 | Intracranial bleeding                                              | Yes | N/A       | No  |
| <b>157Nair 2011</b> | Retrospective observational study |    | ARDS                 | 27 year old patient with H1N1 ARDS                                     | VA to VV   | 17 | Limb ischemia, ECMO cannula bleeding                               | Yes | N/A       | No  |
| <b>157Nair 2011</b> | Retrospective observational study |    | ARDS                 | 29 year old patient with H1N1 ARDS                                     | VV         | 10 |                                                                    | No  | N/A       | No  |
| <b>157Nair 2011</b> | Retrospective observational study |    | ARDS                 | 23 year old patient with H1N1 ARDS                                     | VV         | 27 | Pulmonary bleeding                                                 | Yes | N/A       | No  |
| <b>157Nair 2011</b> | Retrospective observational study |    | ARDS                 | 27 year old patient with H1N1 ARDS                                     | VV         | 15 | ECMO cannula bleeding                                              | No  | N/A       | No  |
| <b>157Nair 2011</b> | Retrospective observational study |    | ARDS                 | 32 year old patient with H1N1 ARDS                                     | VA to VV   | 12 | Limb ischemia, fasciotomy                                          | No  | N/A       | No  |
| <b>158Nair 2017</b> | Case report                       | VD | PAH, cardiac failure | 29 year old patient with PAH, hemoptysis, RV failure cannulated PPD#11 | VA then VV |    | VA then VV ECMO after lung transplant, d/c 1 month post-transplant | No  | N/A       | N/A |

|                          |             |     |                            |                                                                                                                                                                             |                        |    |                                                                                                                                                                       |    |                                              |     |
|--------------------------|-------------|-----|----------------------------|-----------------------------------------------------------------------------------------------------------------------------------------------------------------------------|------------------------|----|-----------------------------------------------------------------------------------------------------------------------------------------------------------------------|----|----------------------------------------------|-----|
| <b>159Naqvi 2018</b>     | Case report | VD  | PPCM                       | 32 year old patient with ALL s/p chemo with LV EF 15% and RV thrombus, IOL and delivery c/b acute DVT and PE, edema to ECMO bridge to transplant                            | VA                     | 60 | Multiple circuit changes, heart transplantation on day 60                                                                                                             | No | N/A                                          | No  |
| <b>160Neurath 1993</b>   | Case report | C/S | ARDS                       | 32 year old patient at 26 weeks with ARDS due to malaria cannulated PPD# 17                                                                                                 | ECCO <sub>2</sub> (VV) | 12 | Tracheotomy, 11 week hospital stay                                                                                                                                    | No | Preterm delivery at 26 weeks, NICU admission | No  |
| <b>161Ngatchou 2012</b>  | Case report | N/A | ARDS                       | 28 year old G2P1 at 32 weeks with urosepsis with e.coli c/b ARDS                                                                                                            | VV                     | 2  | None reported                                                                                                                                                         | No | N/A                                          | N/A |
| <b>162Noah 2010</b>      | Case series | C/S | ARDS                       | 23 year old at 32 weeks with ARDS due to s. aureus p/w hemoptysis intubated emergency c/s worsening status despite NO                                                       | VV                     | 23 | Hemothorax, PTX, CVVH, MARS                                                                                                                                           | No | N/A                                          | N/A |
| <b>163O'Gara 2009</b>    | Case report | C/S | Malignancy , heart failure | 28 year old at 32 and 4/7 weeks with mediastinal mass s/p pericardial window, depressed LV EF on ECMO day 7, later underwent sternotomy and diagnosed with lymphoma         | VA                     | 9  | Sternotomy for biopsy, underwent chemo while on ECMO, later hospital course c/b seizures, candida fungemia, d/c to rehab then home; of note, she died 10 months later | No | Preterm delivery at 32 weeks, NICU           | No  |
| <b>164Pagel 2009</b>     | Case report | C/S | Cardiac arrest             | 24 year old at 24 weeks with Brugada syndrome c/b difficult to control VT episodes, multiple ICD shocks starting at 20 weeks, had arrest requiring shocks and emergency C/S | VA                     | 3  | Groin re-exploration and pseudoaneurysm                                                                                                                               | No | Preterm delivery at 24 weeks, NICU           | No  |
| <b>165Panarello 2010</b> | Case series | C/S | ARDS                       | H1N1 ARDS, ECMO mean 16 days; 1 patient delivered on ECMO                                                                                                                   | N/A                    |    | Mean LOS 37 days                                                                                                                                                      |    |                                              | No  |
| <b>165Panarello 2010</b> | Case series | N/A | ARDS                       | 38 year old at 25 weeks with H1N1 ARDS                                                                                                                                      | N/A                    | 16 | Study mean LOS was 37 days                                                                                                                                            | No | Preterm delivery at 25 weeks, NICU           | No  |

|                                      |                      |     |                    |                                                                                                                                                        |     |    |                                                                                                                                                             |    |                                                                         |     |
|--------------------------------------|----------------------|-----|--------------------|--------------------------------------------------------------------------------------------------------------------------------------------------------|-----|----|-------------------------------------------------------------------------------------------------------------------------------------------------------------|----|-------------------------------------------------------------------------|-----|
| <sup>165</sup> <b>Panarello 2010</b> | Case series          | N/A | ARDS               | 31 year old at 33 weeks with H1N1 ARDS                                                                                                                 | N/A | 16 | Study mean LOS was 37 days                                                                                                                                  | No | Preterm delivery at 33 weeks, NICU                                      | No  |
| <sup>165</sup> <b>Panarello 2010</b> | Case series          | N/A | ARDS               | 23 year old at 39 weeks with H1N1 ARDS                                                                                                                 | N/A | 16 | Study mean LOS was 37 days                                                                                                                                  | No | Preterm delivery at 33 weeks, NICU                                      | No  |
| <sup>166</sup> <b>Panarello 2011</b> | Case report          | C/S | ARDS               | 38 year old at 25 weeks with H1N1 ARDS cannulated antepartum                                                                                           | VV  | 35 | C/S at 30 weeks to improve pulmonary mechanics, GI bleed requiring endoscopic intervention                                                                  | No | Preterm delivery at 30 weeks, intracranial hemorrhage, intubation, NICU | No  |
| <sup>167</sup> <b>Park 2014</b>      | Case report          | C/S | PPCM               | 34 year old G2P1 at 37 weeks with PPCM EF 39% worsening HF planned VA ECMO prior to C/S due to concern to abrupt decreased cardiac output              | VA  | 6  | None                                                                                                                                                        | No | NICU admission, respiratory support                                     | No  |
| <sup>168</sup> <b>Parkins 2007</b>   | Case report          | C/S | ARDS               | 16 year old G1P0 at 32 weeks with influenza ARDS                                                                                                       | VV  | 13 | Emergency C/S due to ineffective ECMO flow rate from uterine compression, infections, renal failure, mild anoxic brain injury, pancreatitis, polyneuropathy | No | Preterm delivery at 32 weeks, NICU admission                            | No  |
| <sup>169</sup> <b>Paruchuri 2018</b> | Retrospective cohort | N/A | ARDS               | Limited details but reported 2 patients with no mortalities                                                                                            | N/A |    |                                                                                                                                                             | No |                                                                         | N/A |
| <sup>170</sup> <b>Patel 2017</b>     | Case report          | C/S | Distributive shock | 34 year old G1P0 with preeclampsia c/b distributive shock postpartum, laparotomy, liver dysfunction listed for liver transplant supported with VV ECMO | VV  | 9  | Liver transplant done while on ECMO, discharged home day 43                                                                                                 | No | N/A                                                                     | N/A |
| <sup>171</sup> <b>Patroniti 2011</b> | Case series          | N/A | ARDS               | Patient at 22 weeks with H1N1 ARDS                                                                                                                     | N/A |    | N/A                                                                                                                                                         | No |                                                                         | N/A |

|                                  |             |     |                                     |                                                                                                                     |     |    |                                                                                                                                  |    |                                              |     |
|----------------------------------|-------------|-----|-------------------------------------|---------------------------------------------------------------------------------------------------------------------|-----|----|----------------------------------------------------------------------------------------------------------------------------------|----|----------------------------------------------|-----|
| <sup>171</sup> Patroniti<br>2011 | Case series | N/A | ARDS                                | 3 postpartum patients (<28 days) who presented with H1N1 ARDS                                                       | N/A |    | N/A                                                                                                                              | No |                                              | N/A |
| <sup>172</sup> Patrut<br>2015    | Case report | C/S | ARDS                                | 32 year old woman at 26 weeks with H1N1 severe ARDS, C/S 1 day after decannulation                                  | VA  | 8  | Femoral artery vascular complications requiring thrombectomy, angioplasty, infected groin wound, ECMO arterial cannula dislodged | No | Preterm delivery at 27 weeks, NICU admission | Yes |
| <sup>173</sup> Pechulis<br>2014  | Case report | N/A | ARDS                                | 24 year old woman with H1N1 ARDS c/b prolonged ECMO                                                                 | VV  | 72 | Femoral artery repair, pelvic hematoma and ex-lap, cholecystectomy, bacteremia, pulmonary HTN, profound weakness, d/c to rehab   | No | N/A                                          | N/A |
| <sup>174</sup> Pekka<br>2013     | Case report | C/S | PE, cardiac failure                 | Patient with massive PE 21 days postpartum, RV failure used as bridge to decision (medical management in this case) | VA  | 2  | None                                                                                                                             | No | N/A                                          | N/A |
| <sup>175</sup> Perdue<br>2018    | Case report | N/A | ARDS, cardiac failure, septic shock | 24 year old patient 2 days postpartum with septic shock from GAS c/b hypotension, ARDS, cardiomyopathy EF <10%      | VA  | 4  | Hysterectomy for endometritis, dry gangrene, asthenia, rehab, depression, using walker, chronic foot pain                        | No | N/A                                          | No  |
| <sup>176</sup> Pereira<br>2018   | Case report | C/S | Pulmonary alveolar proteinosis      | 21 year old patient at 32 weeks with pulmonary alveolar proteinosis c/b hypoxia, VV ECMO done postpartum for BAL    | VV  |    | None                                                                                                                             | No | Preterm delivery at 32 weeks, NICU admission | N/A |

|                                |             |     |                                            |                                                                                                                                                                                                        |     |         |                                                                                            |      |                                                                   |     |
|--------------------------------|-------------|-----|--------------------------------------------|--------------------------------------------------------------------------------------------------------------------------------------------------------------------------------------------------------|-----|---------|--------------------------------------------------------------------------------------------|------|-------------------------------------------------------------------|-----|
| <sup>177</sup> Pham 2013       | Cohort      | N/A | ARDS                                       | 18 patients with H1N1 ARDS                                                                                                                                                                             | N/A |         | IUFD at 21 weeks in one case, preterm delivery at 34 weeks and NICU admission but survived | 4/18 | IUFD at 21 weeks, Preterm delivery at 34 weeks and NICU admission | N/A |
| <sup>178</sup> Phillips 2017   | Case report | C/S | Aspiration pneumonitis, ARDS               | 25 year old G2P1 at 21 weeks with hyperemesis gravidarum with aspiration pneumonitis c/b acute hypoxic respiratory failure with ARDS                                                                   | VV  | 6       | C/S 5 weeks after ECMO                                                                     | No   | Preterm delivery at 26 weeks, NICU, RDS                           | No  |
| <sup>179</sup> Piatrovich 2018 | Case report | C/S | PPH, cardiac arrest                        | 22 year old with PPH s/p VF with CPR, pulmonary edema with IABP and ECMO                                                                                                                               | VA  | 10      | Lamellar dural hematoma, abdominal bleeding requiring ex-lap, transfer to floor on day 13  | No   | N/A                                                               | N/A |
| <sup>180</sup> Piraheli 2012   | Case report | N/A | Propofol infusion syndrome, cardiac arrest | 20 year old woman with status epilepticus treated with propofol, developed PRIS with VT/Vfib went onto ECMO                                                                                            | N/A | 5       | Cerebral artery infarct attributed to cardiac embolism                                     | No   | N/A                                                               | N/A |
| <sup>181</sup> Plotkin 1994    | Case report | C/S | Trauma, ARDS                               | 25 year old patient at 28 weeks with GSW to R chest, fetal bradycardia s/p c/s, lung lacerations, massive transfusion c/b ARDS                                                                         | VA  | 1.70833 | Renal failure, no ECMO complications                                                       | No   | Preterm delivery at 28 weeks, NICU                                | Yes |
| <sup>182</sup> Power 2011      | Case series | N/A | ARDS                                       | 37 year old patient at 23 weeks with H1N1 ARDS                                                                                                                                                         | VV  | 6       | Critical illness polyneuropathy, d/c to rehab, transfusions required                       | No   | Stillborn                                                         | Yes |
| <sup>183</sup> Prakash 2014    | Case report | C/S | Tracheal tumor                             | 23 year old patient at 32 weeks with respiratory distress due to pedunculated tracheal tumor, underwent tumor debulking on PPD#1 with precautionary VV ECMO cannulation - lobular capillary hemangioma | VV  |         | Bleeding during tracheal tumor resection, VV ECMO rescue                                   | No   | Preterm delivery at 32 weeks, NICU admission                      | No  |

|                                          |             |     |                                    |                                                                                                                                                                 |                        |     |                                                                                                        |     |                                                                                |     |
|------------------------------------------|-------------|-----|------------------------------------|-----------------------------------------------------------------------------------------------------------------------------------------------------------------|------------------------|-----|--------------------------------------------------------------------------------------------------------|-----|--------------------------------------------------------------------------------|-----|
| <b><sup>184</sup>Rabin<br/>2012</b>      | Case report | C/S | ARDS                               | 22 year old patient with postpartum wound infection c/b ARDS with prolonged respiratory failure, traction bronchiectasis, lung transplant on CPB after 155 days | VV                     | 155 | None                                                                                                   | No  | N/A                                                                            | N/A |
| <b><sup>185</sup>Rademacher<br/>2010</b> | Case report | C/S | PPCM, heart disease, heart failure | 36 year old woman at 39 weeks with PPCM, severe ischemic heart disease, s/p multiple stents cannulated PPD#2                                                    | N/A                    | 4   | PNA, extubated and decannulated, however day 17 condition worsened and found to have total LV necrosis | Yes | N/A                                                                            | N/A |
| <b><sup>186</sup>Radsel<br/>2018</b>     | Case report | VD  | ARDS                               | 29 year old G1P0 at 23 weeks with H1N1 ARDS                                                                                                                     | VV                     | 10  | Decannulated on day 5 then recannulated, preterm labor, critical illness polyneuropathy, trach, rehab  | No  | Preterm delivery at 25 weeks, NICU, intubated, BPD, NAS from maternal sedation | No  |
| <b><sup>187</sup>Raley<br/>2015</b>      | Case report | C/S | Asthma                             | 18 year old patient at 37 weeks with status asthmaticus, hypercarbic respiratory failure s/p C/S with elevated airway pressures for AVCO <sub>2</sub> removal   | AVCO <sub>2</sub> (VV) | 3   | None                                                                                                   | No  | N/A                                                                            | N/A |
| <b><sup>188</sup>Ramirez<br/>2018</b>    | Case report | N/A | PPCM                               | 29 year old G2P1 at 23 weeks with cardiomyopathy EF 25%, giant cell myocarditis c/b IUFD, IABP and ECMO                                                         | VA                     |     | Uterine bleeding requiring transfusions, ectopy                                                        | No  | IUFD at 23 weeks                                                               | Yes |
| <b><sup>189</sup>Rein<br/>2014</b>       | Case report | VD  | ARDS                               | 38 year old woman delivered at 37 weeks with postpartum ARDS due to influenza B, MRSA                                                                           | N/A                    |     | ARDS, multiple organ failure, transferred for ECMO but no details of cannulation or duration           | Yes | NICU                                                                           | No  |

|                                               |             |     |                                      |                                                                                                                                       |    |      |                                                                                                                                       |     |                                    |     |
|-----------------------------------------------|-------------|-----|--------------------------------------|---------------------------------------------------------------------------------------------------------------------------------------|----|------|---------------------------------------------------------------------------------------------------------------------------------------|-----|------------------------------------|-----|
| <sup>190</sup> <b>Reyftmann 2006</b>          | Case report | C/S | PPH, cardiac arrest, cardiac failure | 36 year old G2P1 at 37 weeks with C/S for twins developed PPH cardiac arrest with EF<10% CPR x2 hours then ECMO                       | VA | 6.25 | Attempted B lynch, bilateral UAligation, subtotal hysterectomy; secondary coagulopathy and need for ex-lap on POD1 for hemoperitoneum | No  | One twin went to NICU for acidosis | No  |
| <sup>191</sup> <b>Riddell 2004</b>            | Case report | C/S | ARDS                                 | 33 year old at 37 weeks with C/S for twins and HELLP c/b hypoxemia, hypotension, ARDS transfer for ECMO on PPD3                       | VA | 21   | Ascites, ischemic colon s/p ex-lap, coagulopathy, renal failure on dialysis, intracerebral hemorrhage                                 | Yes | N/A                                | No  |
| <sup>192</sup> <b>Riester 2015</b>            | Case series | C/S | Cardiac failure, pheo, Takotsubo     | 25 year old patient presented with hypertensive crisis, emergency c/s c/b Takotsubo cardiomyopathy secondary to pheo, pulmonary edema | VA |      | None                                                                                                                                  | No  | None                               | No  |
| <sup>193</sup> <b>Robbins 2015</b>            | Case report | C/S | Asthma                               | 30 year old at 16 weeks with asthma, pneumococcal PNA respiratory failure                                                             | VV | 9    | None                                                                                                                                  | No  | Preterm delivery at 36 weeks       | N/A |
| <sup>194</sup> <b>Roberts on 2010</b>         | Case report | C/S | ARDS                                 | 27 year old G3P1 at 24 weeks with H1N1 ARDS                                                                                           | VV | 17   | Vaginal hemorrhage, trach                                                                                                             | No  | None                               | No  |
| <sup>195</sup> <b>Rodriguez Chaverri 2018</b> | Case report | N/A | PPCM                                 | 33 year old woman with postpartum biventricular dysfunction                                                                           | VA | 7    | Heart transplant after 7 days                                                                                                         | No  | N/A                                | N/A |
| <sup>196</sup> <b>Roncon-Albuquerque 2012</b> | Case series | C/S | ARDS                                 | 36 year old woman with H1N1 ARDS cannulated on PPD#13                                                                                 | VV | 39   |                                                                                                                                       | Yes | N/A                                | N/A |



|                                  |                      |     |                                |                                                                                                                                                                                                                    |     |         |                                                                                                        |     |                                    |     |
|----------------------------------|----------------------|-----|--------------------------------|--------------------------------------------------------------------------------------------------------------------------------------------------------------------------------------------------------------------|-----|---------|--------------------------------------------------------------------------------------------------------|-----|------------------------------------|-----|
| <sup>197</sup> Rubin<br>2013     | Case report          | C/S | PE, cardiac failure            | 38 year old G2P0 at 25 and 3/7 weeks with hypoxia, hypotension, seizure-like activity underwent emergent C/S found to have RV straight, PE with failed suction thrombectomy c/b DIC and shock then put on VVA ECMO | VVA | 8       | DIC prior to ECMO, abdominal compartment syndrome requiring bedside laparotomy and hematoma evacuation | No  | Preterm delivery at 25 weeks, NICU | N/A |
| <sup>198</sup> Sakamoto<br>2018  | Case report          | C/S | Heart disease, cardiac arrest  | 36 year old G2P1 at 38 weeks with history of WPW s/p cardiac arrest, VF s/p ACLS, perimortem C/S to ECMO                                                                                                           | N/A | 3       | Cardiac dysfunction, postpartum bleeding, coagulopathy                                                 | No  | Hypoxic encephalopathy, NICU       | No  |
| <sup>199</sup> Sakanashi<br>1994 | Case report          | C/S | Heart disease, cardiac failure | 32 year old with postpartum dyspnea 33 days after delivery, R heart failure, hypoxemia, Eisenmenger's                                                                                                              | VA  | 3.66667 | None during ECLS, died 57 days after decannulation of sudden cardiac arrest                            | No  | N/A                                | N/A |
| <sup>200</sup> Salazar<br>2017   | Retrospective review | N/A | Dengue                         | 31 year old at 30 weeks with preeclampsia, induced labor at 30 w, postpartum c/b refractory thrombocytopenia and hypoxemic respiratory failure requiring MV and ECMO found to have dengue                          | VV  | 1.5     | Bradycardia during cannulation                                                                         | Yes | N/A                                | N/A |
| <sup>201</sup> Satoh<br>2002     | Case report          | C/S | PAH, cardiac failure           | 33 year old G1P0 at 18 weeks with PAH with mean 70s and worsening of symptoms, termination of pregnancy on ECMO                                                                                                    | VA  | 19      | Coagulation of artificial lung requiring changing                                                      | Yes | TAB, included in infant mortality  | Yes |
| <sup>202</sup> Scherrer<br>2012  | Case report          | C/S | Heart disease, cardiac failure | 24 year old at 36 weeks with tachycardia induced CM secondary to chronic SVT, ECMO on PPD1 then RFA on ECMO successfully terminated rhythm                                                                         | VA  | 4       | Confusion, amnesic disorder, Sheehan's                                                                 | No  | None                               | No  |
| <sup>203</sup> Scriven<br>2009   | Case series          | C/S | ARDS                           | 31 year old at 33 weeks with H1N1 ARDS                                                                                                                                                                             | N/A |         | N/A                                                                                                    | No  | Preterm delivery at 33 weeks       | No  |

|                                      |             |     |                       |                                                                                                                                                    |    |    |                                                                                                                                                                                                                                      |     |                                                            |     |
|--------------------------------------|-------------|-----|-----------------------|----------------------------------------------------------------------------------------------------------------------------------------------------|----|----|--------------------------------------------------------------------------------------------------------------------------------------------------------------------------------------------------------------------------------------|-----|------------------------------------------------------------|-----|
| <sup>204</sup> <b>Seczynska 2014</b> | Case report | C/S | ARDS                  | 33 year old at 28 weeks with H1N1 ARDS cannulated PPD#9                                                                                            | VV | 21 | Bilateral pneumothoraces, R hemothorax                                                                                                                                                                                               | No  | Preterm delivery at 28 weeks prior to ECMO, NICU admission | N/A |
| <sup>205</sup> <b>Seidler 2016</b>   | Case report | C/S | ARDS, malignancy      | 29 year old at 29 weeks with respiratory distress, metastatic choriocarcinoma after c/s on PPD#2                                                   | VV | 5  | None                                                                                                                                                                                                                                 | No  | Preterm delivery at 29 weeks, NICU                         | N/A |
| <sup>206</sup> <b>Sellami 2017</b>   | Case report | N/A | PPCM                  | 29 year old with ectopic pregnancy s/p laparotomy c/b LV failure EF 20% myocarditis                                                                | VA | 15 | Discharged to rehab                                                                                                                                                                                                                  | No  | Ectopic pregnancy                                          | N/A |
| <sup>207</sup> <b>Seong 2018</b>     | Case report | VD  | Cardiac arrest        | 32 year old at 39 weeks with SROM c/b seizure and hypotension then CPR, VT, LV dysfunction, DIC plan for ECMO 1 hour after arrest                  | VA | 1  | Massive transfusion, DIC (AFE)                                                                                                                                                                                                       | No  | None                                                       | No  |
| <sup>208</sup> <b>Seth 2018</b>      | Case report | N/A | Asthma                | 32 year old G2P1 at 23 weeks with status asthmaticus, hypoxic respiratory failure                                                                  | VV |    | N/A                                                                                                                                                                                                                                  | No  | N/A                                                        | No  |
| <sup>209</sup> <b>Shah 2014</b>      | Case report | C/S | ARDS, cystic fibrosis | 22 year old at 29 and 5/7 weeks with influenza A, cystic fibrosis, hypercapnic respiratory failure requiring ICU cannulated 3 weeks after delivery | VV | 39 | Multiorgan failure, worsening CF plan to bridge to lung transplant however required inotrope and multiorgan failure; awake ECMO 3 weeks into ICU stay started as bridge to salvage lung transplant for CF, died after 60 days in ICU | Yes | Preterm delivery at 32 weeks, NICU admission               | No  |
| <sup>210</sup> <b>Shamsah 2017</b>   | Case report | VD  | PAH, cardiac arrest   | 25 year old G2P1 at 26 weeks with pulmonary hypertension, heart failure s/p arrest during labor, delivered amidst CPR and ECMO cannulation         | VA | 14 | Prepared for heart/lung transplant but abruptly decompensated and died after ECLS                                                                                                                                                    | Yes | Preterm delivery at 26 weeks, NICU                         | N/A |

|                                 |                                   |     |                                 |                                                                                                                                           |     |     |                                                                                                         |     |                                         |     |
|---------------------------------|-----------------------------------|-----|---------------------------------|-------------------------------------------------------------------------------------------------------------------------------------------|-----|-----|---------------------------------------------------------------------------------------------------------|-----|-----------------------------------------|-----|
| <sup>8</sup> Sharma 2015        | Case series, Systematic review    | N/A | ARDS                            | Patient at 25 weeks with mycoplasma ARDS                                                                                                  | VV  | 5   | Minor bleeding at trach and ECMO catheter site                                                          | No  | N/A                                     | No  |
| <sup>8</sup> Sharma 2015        | Case series, Systematic review    | N/A | ARDS                            | Patient on PPD#1 with influenza A ARDS                                                                                                    | VV  | 4   | Minor vaginal bleeding                                                                                  | No  | N/A                                     | No  |
| <sup>8</sup> Sharma 2015        | Case series, Systematic review    | VD  | Cardiac failure                 | Patient at 34 weeks with cardiogenic shock likely viral                                                                                   | VA  | 6   | STEMI, vaginal bleeding, clot in circuit                                                                | No  | Preterm delivery at 34 weeks, stillborn | Yes |
| <sup>8</sup> Sharma 2015        | Case series, Systematic review    | N/A | PPCM, ARDS                      | Patient on PPD#2 with peripartum cardiomyopathy ARDS unknown                                                                              | VV  | 6   | Minor vaginal and trach site bleeding                                                                   | No  | N/A                                     | No  |
| <sup>211</sup> Shen 2009        | Case report                       | C/S | AFE, cardiac arrest             | 21 year old G2P1 at 33 weeks with AFE c/b PEA to ECMO                                                                                     | VA  | 1   | None                                                                                                    | No  | Preterm delivery at 33 weeks            | No  |
| <sup>212</sup> Shuang 2016      | Case report                       | C/S | ARDS                            | 40 year old at 35 weeks with ARDS from H5N6 cannulated PPD# 2                                                                             | N/A | 46  | Multiorgan failure, pulmonary HTN, died on day 50                                                       | Yes | N/A                                     | N/A |
| <sup>213</sup> Sim 2012         | Case report                       | C/S | Cardiac failure, cardiac arrest | 28 year old at 26 weeks with refractory SVT with cardiogenic shock crashed to ECMO, had IUFD, had RFA, later c/s                          | VA  | 7   | None reported                                                                                           | No  | SAB at 26 weeks                         | Yes |
| <sup>214</sup> Skolnik 2017     | Multicenter, retrospective cohort | N/A | AFE                             | 4 patients with AFE                                                                                                                       | VA  |     | 2 ECMO died within first few hours, 1 CPB died, 1 major 1 minor neurologic morbidity, not including CPB | 2/4 |                                         | N/A |
| <sup>215</sup> Smiechowicz 2011 | Case report                       | C/S | ARDS, cardiac arrest            | 37 year old with postpartum H1N1 ARDS (5 weeks PP) c/b PEA and hypercarbia requiring CO2 removal, required dialysis, discharged on day 24 | VV  | 8.5 | Started CO2 removal x 6 days, then off for 36 h then resumed on day 8 for another 60 h                  | No  | N/A                                     | N/A |

|                                           |                      |     |                                  |                                                                                                                                                                                                                     |    |         |                                                                                                          |     |                                              |                          |
|-------------------------------------------|----------------------|-----|----------------------------------|---------------------------------------------------------------------------------------------------------------------------------------------------------------------------------------------------------------------|----|---------|----------------------------------------------------------------------------------------------------------|-----|----------------------------------------------|--------------------------|
| <b><sup>216</sup>Smith<br/>2009</b>       | Case report          | VD  | PPH, PPCM                        | 19 year old G2P0 at 38 weeks with PPH requiring uterotonics, emergency hysterectomy, massive transfusions, TTE with LV EF 25%, bradycardic arrests requiring CPR, TEE EF <5%, external cardiac massage then VA ECMO | VA | 2.83333 | None                                                                                                     | No  | N/A                                          | N/A                      |
| <b><sup>217</sup>Stankiewicz<br/>2011</b> | Case report          | C/S | ARDS                             | 23 year old at 37 weeks with H1N1 ARDS cannulated 12 days postpartum                                                                                                                                                | VV | 26      | PTX, thoracotomy, replacement of oxygenator                                                              | No  | N/A                                          | N/A                      |
| <b><sup>218</sup>Steinack<br/>2017</b>    | Case report          | N/A | Asthma                           | 25 year old at 5 weeks with status asthmaticus with hypoxic respiratory failure despite maximal medical therapy                                                                                                     | VV | 2       | Retrochorial hematoma, resolved and went on to delivery healthy boy at 38 weeks; discharged 9 days later | No  | None                                         | No                       |
| <b><sup>219</sup>Strecker<br/>2012</b>    | Case report          | VD  | Cerebral venous thrombosis, ARDS | 28 year old with cerebral venous thrombosis c/b R frontal lobe edema s/p craniectomy c/b ARDS cannulated 15 days postpartum                                                                                         | VV | 110     | Multiple infections                                                                                      | No  | N/A                                          | N/A                      |
| <b><sup>220</sup>Su<br/>2014</b>          | Retrospective review | C/S | PPCM                             | 32 year old at 30 weeks with PPCM in 3rd trimester, emergency c/s for maternal distress represented 1 month later after collapse                                                                                    | VA | 5       | None                                                                                                     | Yes | Preterm delivery at 30 weeks, NICU admission | N/A                      |
| <b><sup>220</sup>Su<br/>2014</b>          | Retrospective review | C/S | PPCM                             | 27 year old at 34 weeks with PPCM in 3rd trimester, emergency c/s for maternal distress represented 1 month later after collapse                                                                                    | VA | 8.5     | None                                                                                                     | No  | Preterm delivery at 34 weeks                 | N/A                      |
| <b><sup>221</sup>Takacs<br/>2018</b>      | Case report          | VD  | Cardiac arrest, ARDS             | 21 year old G3P2 at 24 weeks with cardiac arrest with CPR, SROM during resuscitation, pulmonary contusions and ARDS                                                                                                 | VA | 7       | SAB during collapse, DIC while on ECLS, possible due to IUFD so underwent IOL,                           | No  | IUFD prior to ECLS                           | Not counted in mortality |

|                               |             |     |                           |                                                                                                                                                                                  |          |    |                                                                                                        |     |                                    |     |
|-------------------------------|-------------|-----|---------------------------|----------------------------------------------------------------------------------------------------------------------------------------------------------------------------------|----------|----|--------------------------------------------------------------------------------------------------------|-----|------------------------------------|-----|
|                               |             |     |                           |                                                                                                                                                                                  |          |    | VAVD, retained POC, subsequent D&C on ECMO                                                             |     |                                    |     |
| <sup>222</sup> Takeda 2012    | Case series | N/A | ARDS                      | Patient with H1N1 ARDS                                                                                                                                                           | VV       |    |                                                                                                        | No  |                                    | N/A |
| <sup>223</sup> Tampo 2014     | Case report | N/A | PPCM                      | 32 year old G1P0 at 39 and 5/7 weeks with PPCM, LV EF 33% cannulated PPD#3                                                                                                       | VA       | 5  | None                                                                                                   | No  | N/A                                | N/A |
| <sup>224</sup> Theodorou 2015 | Case report | N/A | Asthma                    | 38 year old G1P0 at 16 weeks with status asthmaticus, hypercarbic respiratory failure                                                                                            | VV       | 8  | Severe mucosal bleeding, small intracerebral hemorrhage                                                | No  | Ventriculomegaly                   | N/A |
| <sup>225</sup> Tinco 2018     | Case report | C/S | AFE, ARDS, cardiac arrest | 35 year old G1P0 at 39 weeks with hypoxia, DIC, AFE c/b cardiac arrest, PPH, hysterectomy, ARDS, RV failure onto ECMO                                                            | VA       | 4  | Hemorrhagic shock before ECMO from AFE                                                                 | No  | N/A                                | N/A |
| <sup>226</sup> Ull 2017       | Case report | C/S | PPCM                      | 26 year old multiparous woman at 34 weeks with placenta previa increta, C/S with hysterectomy cannulated immediately postpartum                                                  | VV       | 71 | PPCM with EF <20%, need for intermittent dialysis; made full recovery by 12 months                     | No  | Preterm delivery at 34 weeks, NICU | No  |
| <sup>227</sup> Unterberg 2017 | Case report | VD  | ARDS                      | 29 year old G1P0 at 38 weeks with HELLP c/b several intracerebral hemorrhage and coagulopathy s/p EVD c/b pseudomonas PNA and ARDS with refractory hypercapnia cannulated PPD# 9 | VV (iLA) | 42 | Severe neurological dysfunction, IVH, tracheostomy, rehab, 42 days ECMO then 10 additional days of iLA | No  | NICU admission                     | No  |
| <sup>228</sup> Uribarri 2017  | Case series | N/A | ARDS                      | Patient with ARDS due to influenza A during pregnancy                                                                                                                            | VV       | 2  | Bleeding                                                                                               | Yes | N/A                                | N/A |

|                                           |             |     |                                                  |                                                                                                                                                                                                                                                                                 |            |     |                                                                                                          |    |                                               |     |
|-------------------------------------------|-------------|-----|--------------------------------------------------|---------------------------------------------------------------------------------------------------------------------------------------------------------------------------------------------------------------------------------------------------------------------------------|------------|-----|----------------------------------------------------------------------------------------------------------|----|-----------------------------------------------|-----|
| <sup>229</sup> Van<br>Zwet 2016           | Case report | C/S | Cardiac failure, cardiac arrest, pheo, Takotsubo | 27 year old at 35 and 2/7 weeks who presented with respiratory distress, hypertensive crisis, fetal bradycardia -> emergency C/S with refractory hypotension, pulmonary edema and PEA x2, TEE with EF 20-25% to VA ECMO, found to have pheo removed 22 days after initial event | VA then VV | 7   | VA 5 days, VV 2 days                                                                                     | No | Preterm delivery at 35 weeks, intubated, NICU | No  |
| <sup>230</sup> Veld-van<br>Wingerden 2015 | Case report | VD  | ARDS                                             | 22 year old G5P3 at 18 weeks with ARDS due to strep pyogenes PNA/ARDS, pregnancy loss prolonged ECMO course cannulated after spontaneous abortion                                                                                                                               | VV         | 108 | Enterococcus septicemia, massive hemothorax, pulmonary hemorrhage, circuit changed 5 times, trach, rehab | No | SAB at 18 weeks                               | Yes |
| <sup>231</sup> Verroust<br>2007           | Case report | VD  | AFE, cardiac arrest                              | 29 year old G3P2 at 35 weeks with termination for porencephaly so ruptured membranes, 15 minutes later had cardiac arrest TTE with RV failure, delivered fetus within 1 hour then massive bleeding, transferred hospital, EF <15% went onto ECLS                                | VA         | 20  | Bleeding prior to ECLS related to AFE                                                                    | No | N/A                                           | Yes |
| <sup>232</sup> Visvesw<br>aran 2016       | Case report | C/S | Septic shock, PPCM                               | 31 year old at 23 weeks with sepsis c/b cardiomyopathy, LV dysfunction EF 25-30% treated with IV T3                                                                                                                                                                             | VV         | 6   | None, discharged home on day 20                                                                          | No | None                                          | No  |
| <sup>233</sup> Vitulo<br>2017             | Case series | C/S | PAH, cardiac arrest                              | 31 year old at 32 weeks with pre-capillary PAH Group V, scheduled c/s c/b post-delivery cardiac arrest, RV dysfunction so went onto ECMO                                                                                                                                        | VA         | 1   | None                                                                                                     | No | Preterm delivery at 32 weeks, NICU admission  | N/A |

|                                          |             |     |                      |                                                                                                                                                                                 |            |    |                                                                                                                        |     |                                                      |     |
|------------------------------------------|-------------|-----|----------------------|---------------------------------------------------------------------------------------------------------------------------------------------------------------------------------|------------|----|------------------------------------------------------------------------------------------------------------------------|-----|------------------------------------------------------|-----|
| <sup>233</sup> <b>Vitulo 2017</b>        | Case series | C/S | PAH                  | 31 year old at 32 weeks with pre-capillary PAH Group I, scheduled c/s with planned pre-incision ECMO                                                                            | VA         | 1  | Urgent re-laparotomy for bleeding on POD3, thought not to be related to ECMO                                           | No  | Preterm delivery at 32 weeks, NICU admission         | N/A |
| <sup>234</sup> <b>Wall 2010</b>          | Case report | N/A | Cardiac arrest       | 39 year old G2P1 at 18 weeks with acute PEA, out of hospital arrest                                                                                                             | VA         | 3  | Compartment syndrome of lower extremity requiring fasciotomy, planned AKA but due to neurological damage withdrew care | Yes | Maternal PE at 18 weeks                              | Yes |
| <sup>235</sup> <b>Wang 2015</b>          | Case report | VD  | ARDS                 | 29 year old at 27 weeks with H7N9 ARDS                                                                                                                                          | VV then VA | 19 | AF, heart failure, sepsis due to acinetobacter, PE; VV 4 days VA 15 days                                               | Yes | SAB delivered 4 days after loss of fetal heart tones | Yes |
| <sup>236</sup> <b>Wei 2011</b>           | Case report | C/S | PE, cardiac arrest   | 36 year old G1P1 delivered at 37 weeks with PE with PEA, cardiac massage to ECMO then pulmonary thrombectomy                                                                    | N/A        |    | None                                                                                                                   | No  | N/A                                                  | N/A |
| <sup>237</sup> <b>Weinberg 2011</b>      | Case report | C/S | PAH, cardiac failure | 27 year old G4P3 at 31 weeks with chronic pulmonary thromboembolic disease with RV dysfunction, post C/S ECMO cannulated catheter thrombolysis and suction catheter embolectomy | VA         | 4  | Renal replacement therapy, trach                                                                                       | No  | Preterm delivery at 31 weeks, intubated, NICU        | No  |
| <sup>238</sup> <b>Welch 2010</b>         | Case report | C/S | ARDS                 | 34 year old G2P1 at 21 weeks with ARDS due to H1N1                                                                                                                              | VV         | 19 | VAP, trach, severe weakness                                                                                            | No  | Preterm delivery at 35 weeks                         | No  |
| <sup>239</sup> <b>Wertasc hnigg 2017</b> | Case series | C/S | Cardiac arrest       | Patient with prolonged AVNRT emergency C/S cardiac arrest cannulated immediately postpartum                                                                                     | VA         | 10 | Brain bleed                                                                                                            | Yes | N/A                                                  | N/A |

|                                      |                         |     |                                       |                                                                                                                                                |                  |         |                                                                                                                                                                                                                              |      |                                                                                                                           |      |
|--------------------------------------|-------------------------|-----|---------------------------------------|------------------------------------------------------------------------------------------------------------------------------------------------|------------------|---------|------------------------------------------------------------------------------------------------------------------------------------------------------------------------------------------------------------------------------|------|---------------------------------------------------------------------------------------------------------------------------|------|
| <sup>239</sup> Wertasc<br>hnigg 2017 | Case series             | C/S | PE, cardiac<br>arrest                 | Patient with massive PE<br>with cardiac arrest s/p C/S<br>cannulated immediately<br>postpartum                                                 | VA               |         | Brain bleed                                                                                                                                                                                                                  | Yes  | N/A                                                                                                                       | N/A  |
| <sup>239</sup> Wertasc<br>hnigg 2017 | Case series             | VD  | ARDS                                  | Patient at 24 weeks with<br>H1N1 ARDS                                                                                                          | VV               |         | Preterm labor at<br>26 weeks, NICU                                                                                                                                                                                           | No   | Preterm labor at<br>26 weeks, NICU                                                                                        | No   |
| <sup>240</sup> Weyrich<br>2016       | Case report             | C/S | PPH, ARDS,<br>cardiac<br>arrest       | 36 year old G6P5 at 38<br>weeks with uterine rupture,<br>PPH, ARDS c/b bradycardia<br>s/p CPR refractory<br>hypoxemia cannulated on<br>PPD# 10 | VV               | 50      | Bladder bleeding<br>s/p coagulation,<br>bacterial<br>contamination of<br>circuit, trach                                                                                                                                      | No   | N/A                                                                                                                       | No   |
| <sup>241</sup> Williams<br>2008      | Retrospective<br>review | N/A | ARDS,<br>cardiac<br>failure,<br>HELLP | 17 patients included for<br>various indications including<br>infectious (9), cardiac (4),<br>HELLP (3)                                         | N/A              |         |                                                                                                                                                                                                                              | 4/17 | 3 patients on ECLS<br>with pre-viable<br>fetus and all died,<br>1 before ECLS, 1<br>maternal death, 1<br>IUFD during ECLS | 3/17 |
| <sup>242</sup> Wise<br>2016          | Case report             | VD  | AFE,<br>cardiac<br>arrest             | 34 year old G1P0 at 39 and<br>4/7 weeks with AFE,<br>hemodynamic collapse with<br>RDS, VAVD                                                    | VV<br>then<br>VA | 3       | Need for dialysis<br>during<br>hospitalization,<br>ischemic bullae<br>on lower<br>extremities<br>secondary to<br>reperfusion injury<br>and multiple<br>sacral wounds; No<br>longer required<br>CRRT at 3 months<br>follow up | No   | None                                                                                                                      | No   |
| <sup>243</sup> Yang<br>2007          | Case report             | N/A | PPCM                                  | 18 year old at 40 weeks<br>with desaturation during<br>C/S, HTN, severe pulmonary<br>edema, EF 18%,                                            | VA               | 0.85714 | Vaginal bleeding                                                                                                                                                                                                             | No   | N/A                                                                                                                       | N/A  |
| <sup>244</sup> Yang<br>2014          | Case report             | N/A | PE, cardiac<br>arrest                 | 30 year old G4P1 at 36 and<br>5/7 weeks with massive PE<br>c/b PEA given tPA<br>underwent thrombectomy<br>under ECMO                           | VA               | 7       | DIC, transfusions,<br>intracranial<br>hemorrhage                                                                                                                                                                             | Yes  | N/A                                                                                                                       | No   |



|                               |                      |     |                                |                                                                                                                                                         |     |    |                                                                                                   |     |                                              |     |
|-------------------------------|----------------------|-----|--------------------------------|---------------------------------------------------------------------------------------------------------------------------------------------------------|-----|----|---------------------------------------------------------------------------------------------------|-----|----------------------------------------------|-----|
| <sup>245</sup> Yeh<br>2013    | Case report          | VD  | Heart disease, cardiac failure | 25 year old on PPD# 7 with hypoxia found to have giant PDA and Eisenmenger                                                                              | N/A | 30 | Multiorgan failure, pulmonary HTN                                                                 | Yes | N/A                                          | N/A |
| <sup>246</sup> Young<br>2016  | Case report          | C/S | PE, cardiac arrest             | 39 year old on PPD# 0 from cesarean delivery with cardiac arrest s/p CPR found to have massive PE, RV dysfunction s/p ECMO then mechanical thrombectomy | N/A | 1  | Abdominal compartment syndrome, uterine bleeding, laparotomy, hospitalized for 6 weeks, d/c to PT | No  | N/A                                          | N/A |
| <sup>247</sup> Zhang<br>2018  | Case series          | C/S | PAH, heart failure             | 22 year old G2P0 at 37 weeks with PAH cannulated postpartum                                                                                             | VA  |    | Pulmonary hypertension crisis, HF                                                                 | Yes | Neonatal distress, NICU                      | No  |
| <sup>247</sup> Zhang<br>2018  | Case series          | C/S | PAH, heart failure             | 25 year old G5P1 at 32 weeks with PAH cannulated postpartum                                                                                             | VA  |    | Pulmonary hypertension crisis, HF                                                                 | Yes | Preterm delivery at 32 weeks, NICU admission | No  |
| <sup>248</sup> Zhang<br>2018  | Case series          | C/S | PAH                            | Patient on PPD# 0 with RV failure after delivery/oxytocin requiring ECMO                                                                                | VA  | 3  |                                                                                                   | Yes | Preterm delivery                             | No  |
| <sup>248</sup> Zhang<br>2018  | Case series          | C/S | PAH                            | Patient on PPD# 0 with RV failure after delivery/oxytocin requiring ECMO                                                                                | VA  | 5  |                                                                                                   | Yes | Neonatal distress (NICU admission)           | No  |
| <sup>249</sup> Zingel<br>2012 | Case report          | C/S | PPCM                           | 30 year old G1P1 with PPCM 17 days postpartum, medically treated then IABP/ECMO                                                                         | N/A |    | None, total ICU course was 14 days                                                                | No  | N/A                                          | N/A |
| <sup>250</sup> Zykova<br>2010 | Retrospective review | N/A | ARDS                           | 25 year old with H1N1 flu while pregnant                                                                                                                | N/A |    |                                                                                                   | No  | N/A                                          | N/A |

ECLS = extracorporeal life support; VD = vaginal delivery; VAVD = vacuum-assisted vaginal delivery; C/S = cesarean delivery, D&C = dilation and curettage; VV = venovenous; VA = venoarterial; NICU = neonatal intensive care unit; ARDS = acute respiratory distress syndrome; PAH = pulmonary arterial hypertension; PEA = pulseless electrical activity; CPR = cardiopulmonary resuscitation; PNA = pneumonia; TRALI = transfusion related acute lung injury; ECPR = extracorporeal cardiopulmonary resuscitation; PE = pulmonary embolism; AFE = amniotic fluid embolism; DIC = disseminated intravascular coagulation; BKA = below the knee amputation; DVT = deep vein thrombosis; GA = gestational age; PPH = postpartum hemorrhage; tPA = tissue plasminogen activator; D&E = dilation and evacuation; IUFD = intrauterine fetal death; ILD = interstitial lung disease; IOL = induction of labor; RV = right ventricle; PPCM = peripartum cardiomyopathy; VT = ventricular tachycardia; LV = left ventricle; EF = ejection fraction; GAS = group A streptococcus; SAB = spontaneous abortion; MS = mitral stenosis; TAB = therapeutic abortion; TTP = thrombotic thrombocytopenic purpura; HELLP = hemolysis, elevated liver enzymes, low platelets; ECCO<sub>2</sub> removal = extracorporeal carbon dioxide removal; HIT = heparin induced thrombocytopenia; IVIG = intravenous immunoglobulin; PA = pulmonary artery; PTE = pulmonary thrombectomy; ED = emergency department; TTE = transthoracic echocardiogram; IUGR = intrauterine growth restriction; AML = acute myeloid leukemia; iLA = interventional lung assist; LAM = lymphangioliomyomatosis; DAH = diffuse alveolar hemorrhage; RDS = respiratory distress syndrome; d-TGA = dextro-transposition of the great arteries; MV = mitral valve; HF = heart failure; OR = operating room; HD = hemodialysis; BiVAD = biventricular assist device; IABP = intraaortic balloon pump; ACS = acute coronary syndrome; LAD = left anterior descending coronary artery; POD = post-operative day; CABG = coronary arterial bypass graft; SCAD = spontaneous coronary artery dissection; CPB = cardiopulmonary bypass; SVT = supraventricular tachycardia; AKI = acute kidney injury; VAP = ventilator associated pneumonia; NSCLC = non-small cell lung cancer; LVAD = left ventricular assist device; PTX = pneumothorax; IVH =

intraventricular hemorrhage; PEG = percutaneous endoscopic gastrostomy; PPD = postpartum day; POC = products of conception; POD = postoperative day; ICU = intensive care unit; UAE = uterine artery embolization; TAE = transcatheter arterial embolization; Vfib = ventricular fibrillation; SOB = shortness of breath; BiV = biventricular; SVG = saphenous vein graft; UA = umbilical artery; MI = myocardial infarction; pheo = pheochromocytoma; CHF = congestive heart failure; CHD = congenital heart disease; VSD = ventricular septal defect; MARS = molecular adsorbent recirculating system; TAH = total artificial heart; OHT = orthotopic heart transplantation; SVC = superior vena cava; ALL = acute lymphoblastic leukemia; CVVH = continuous veno-venous hemofiltration; NO = nitric oxide; ICD = implantable cardioverter defibrillator; LOS = length of stay; GI = gastrointestinal; BAL = bronchoalveolar lavage; VF.= ventricular fibrillation; PRIS = propofol infusion syndrome; BPD = bronchopulmonary dysplasia; NAS = neonatal abstinence syndrome; AVCO<sub>2</sub> = extracorporeal arteriovenous carbon dioxide removal; MRSA = methicillin resistant staph aureus; WPW = Wolff-Parkinson-White syndrome; CM = cardiomyopathy; RFA = radiofrequency ablation; SROM = spontaneous rupture of membranes; CF = cystic fibrosis; STEMI = ST elevation myocardial infarction; TEE = transesophageal echocardiogram; AKA = above knee amputation; CRRT = continuous renal replacement therapy; HTN = hypertension; PDA = patent ductus arteriosus

**Table S2. Cases of deliveries on ECMO (n = 35).**

| Study (Author, Year)                | Delivery Type | Case details                                                                                                                       | ECLS Type  | ECLS Duration (Days) | Maternal Complications                                                                                               | Maternal Mortality | Cause of Maternal Death                                   | Fetal Complications                | Fetal Mortality | Anticoagulation                                                                               |
|-------------------------------------|---------------|------------------------------------------------------------------------------------------------------------------------------------|------------|----------------------|----------------------------------------------------------------------------------------------------------------------|--------------------|-----------------------------------------------------------|------------------------------------|-----------------|-----------------------------------------------------------------------------------------------|
| <b>Agerstrand 2016<sup>36</sup></b> | C/S           | Patient at 34.9 weeks with PAH requiring VV support then septic shock requiring VA, on ECMO for 3 days prior to delivery           | VV then VA | 24                   | DIC, abdominal compartment syndrome, VV 12d then VA for 12d                                                          | No                 | N/A                                                       | N/A                                | Yes             | N/A                                                                                           |
| <b>Agerstrand 2016<sup>36</sup></b> | C/S           | Patient at 26.4 weeks with H1N1 ARDS                                                                                               | VV         |                      | ARDS, renal failure, septic shock, preeclampsia, DIC, multisite bleeding                                             | No                 | N/A                                                       |                                    | N/A             | N/A                                                                                           |
| <b>Alyamani 2018<sup>38</sup></b>   | C/S           | 38 year old G9P8 at 30.4 weeks with sarcoidosis with ARDS, alveolar hemorrhage                                                     | VV         | 14                   | Profuse bleeding after bronchoscopy, DVT after decannulation                                                         | No                 | N/A                                                       | Preterm delivery at 31 weeks, NICU | No              | Anticoagulated with institutional goal PTT 45-55                                              |
| <b>Bautista 2018<sup>45</sup></b>   | C/S           | 18 year old at 24 weeks with PAH due to chronic venoocclusive disease                                                              | VV         | 10                   | Worsening after VV ECMO decannulation, lung transplant complicated by rejection, hemodynamic and respiratory failure | Yes                | Died 1 day after decannulation of cardiopulmonary failure | IUFD at 24 hours                   | Yes             | N/A                                                                                           |
| <b>Biderman 2017<sup>50</sup></b>   | VD            | 30 year old at 20 weeks with ARDS, infectious pneumonia with h. influenza and septic shock                                         | VA         | 3                    | Tracheotomy                                                                                                          | No                 | N/A                                                       | Died 3 days into ECLS              | Yes             | Heparin started at time of cannulation - 5000 IU bolus then gtt titrated to patient condition |
| <b>Biderman 2017<sup>50</sup></b>   | VD            | 37 year old at 13 weeks with ARDS due to H1N1                                                                                      | VA then VV | 16                   | Disseminated intravascular coagulation (DIC), tracheotomy; VA 7 days then VV for 9 days                              | Yes                | Sepsis, died after decannulation                          | SAB                                | Yes             | Heparin started at time of cannulation - 5000 IU bolus then gtt titrated to patient condition |
| <b>Bowkalow 2011<sup>53</sup></b>   | VD            | 24 year old G4P2 at 20.9 weeks with H1N1 ARDS                                                                                      | N/A        | 28                   | Died                                                                                                                 | Yes                | Multiorgan failure                                        | SAB at 21 weeks                    | Yes             | N/A                                                                                           |
| <b>Bruch 2013<sup>54</sup></b>      | CD            | 31 year old G1P0 at 19 weeks with PE and cardiac arrest requiring CPR, ECLS and thrombectomy, stillbirth at 19 weeks requiring D&C | VA         | 5                    | Bleeding requiring transfusions                                                                                      | No                 | N/A                                                       | SAB on ECMO                        | Yes             | N/A                                                                                           |

|                                      |     |                                                                                                                                                                                               |          |          |                                                                                                                                        |     |                                   |                                                                           |     |                                                                                                   |
|--------------------------------------|-----|-----------------------------------------------------------------------------------------------------------------------------------------------------------------------------------------------|----------|----------|----------------------------------------------------------------------------------------------------------------------------------------|-----|-----------------------------------|---------------------------------------------------------------------------|-----|---------------------------------------------------------------------------------------------------|
| <b>Chao 2016</b> <sup>58</sup>       | VD  | 35 year old G1P0 at 16 weeks with viral PNA causing hypoxemic respiratory failure, ARDS                                                                                                       | VV       | 9        |                                                                                                                                        | No  | N/A                               | SAB at 16 weeks                                                           | Yes | N/A                                                                                               |
| <b>Coscia 2012</b> <sup>66</sup>     | CD  | 31 year old at 24 weeks with recent M3 AML developed hypoxemic respiratory failure c/b ARDS, spontaneously delivered 48 hours into iLA                                                        | iLA (VV) | 8        | Died 53 days after admission from AML complications                                                                                    | No  | N/A                               | Unclear outcome, spontaneous preterm delivery at 24 weeks, NICU admission | N/A | iLA, no anticoagulation because PTT was 2.3x normal and platelets 57K                             |
| <b>Crawford 2015</b> <sup>68</sup>   | C/S | 37 year old G1P0 at 21 weeks with influenza A ARDS c/b HELLP with newly diagnosed LAM (lymphangiioleiomyomatosis) and diffuse alveolar hemorrhage (DAH)                                       | VV       | 14       | Had lung biopsy for LAM during ECMO run, was given endobronchial recombinant factor VII during run                                     | No  | N/A                               | Preterm delivery at 24 weeks, NICU, respiratory/nutritional support       | No  | N/A                                                                                               |
| <b>DiLorenzo 2016</b> <sup>72</sup>  | C/S | Patient at 33 weeks with mitral valve regurgitation due to prosthetic valve thrombosis with NYHA Class III HF planned c/s after VA ECMO and MV replacement, ECMO in OR immediately before c/s | VA       | 2        | None                                                                                                                                   | No  | N/A                               | N/A                                                                       | No  | Heparin continued with PTT goal 50-60                                                             |
| <b>Jandhyala 1994</b> <sup>118</sup> | VD  | 20 year old G3P1 at 30 weeks with ARDS secondary to e.coli urosepsis with refractory hypoxemia for ECCO <sub>2</sub> removal                                                                  | VV       | 1.833333 | None                                                                                                                                   | No  | N/A                               | Preterm delivery at 30 weeks, NICU                                        | No  | Heparin with goal ACT 180-200 but reduced to 150 for delivery and first 6 hours after             |
| <b>Ju 2018</b> <sup>122</sup>        | C/S | 36 year old G2P1 at 21 weeks with twin pregnancy complicated by chorioamnionitis, septic shock                                                                                                | VV       | 9        | Fingertip amputation due to ischemia                                                                                                   | No  | N/A                               | Therapeutic abortion, twins                                               | Yes | Anticoagulated with goal ACT 130-150                                                              |
| <b>Kunstyr 2010</b> <sup>133</sup>   | VD  | 26 year old at 24 weeks with H1N1 ARDS                                                                                                                                                        | VV       | 14       | Hemorrhagic bronchitis, cephalic vein thrombosis, pseudomonas infection                                                                | No  | N/A                               | Preterm delivery at 24 weeks, NICU, respiratory support                   | No  | On heparin target ACT 160-180, PTT 50-60, stopped infusion for delivery and resumed 3 hours later |
| <b>Lee 1997</b> <sup>136</sup>       | VD  | 26 year old at 17 weeks with varicella PNA ARDS                                                                                                                                               | VA to VV | 57       | Cannula dislodgment, bilateral tension hemopneumothoraces, bronchopleural fistulas, multiple re-explorations for bleeding, right heart | Yes | Multiple organ system dysfunction | SAB at 21 weeks                                                           | Yes | N/A                                                                                               |

|                                      |     |                                                                                        |            |          |                                                                                 |    |                                               |                                                                                |    |                                                                                                                                     |
|--------------------------------------|-----|----------------------------------------------------------------------------------------|------------|----------|---------------------------------------------------------------------------------|----|-----------------------------------------------|--------------------------------------------------------------------------------|----|-------------------------------------------------------------------------------------------------------------------------------------|
|                                      |     |                                                                                        |            |          | failure, hepatic abscesses                                                      |    |                                               |                                                                                |    |                                                                                                                                     |
| <b>Lysenko 2014</b> <sup>146</sup>   | C/S | 24 year old G1P0 at 39.4 weeks with H1N1 ARDS, cesarean delivery at 30 weeks 3 days    | VV         | 17       | None                                                                            | No | N/A                                           | Preterm delivery at 30 week, intubated, NICU admission                         | No | Discontinued heparin 5 hours before delivery and resumed 14 hours after delivery under GA - no bleeding or thrombotic complications |
| <b>Meng 2017</b> <sup>23</sup>       | C/S | Patient at 35 weeks with PAH due to CHD/Eisenmenger, cannulated 2 days before delivery | VV then VA | 21       | Discharged home on PPD24 found dead at home on PPD89, VV 15 days then VA 6 days | No | Postpartum day 89, unwitnessed cardiac arrest | Preterm delivery at 35 weeks                                                   | No | N/A                                                                                                                                 |
| <b>Mikami 2018</b> <sup>154</sup>    | C/S | 38 year old G3P2 at 35. weeks with PPCM EF10%, had IABP and ECMO prior to cesarean     | VA         | 8        | Uterine bleeding s/p Bakri, transcatheter arterial embolization, hysterectomy   | No | N/A                                           | Preterm delivery at 35 weeks, neonatal asphyxia, therapeutic hypothermia, NICU | No | Unfractionated heparin to maintain ACT 180-200                                                                                      |
| <b>Morsolini 2017</b> <sup>156</sup> | C/S | Patient at 31 weeks with PAH                                                           | VA         | 1.083333 | SVC and PA thrombosis                                                           | No | N/A                                           | None                                                                           | No | Low anticoagulation used with goal PTT 40-50, all had heparin gtt and it was held during c/s                                        |
| <b>Morsolini 2017</b> <sup>156</sup> | C/S | Patient at 31 weeks with H1N1 ARDS                                                     | VV         | 31       | Gastrointestinal bleeding                                                       | No | N/A                                           | IVH, discharged alive                                                          | No | Low anticoagulation used with goal PTT 40-50, all had heparin gtt and it was held during c/s                                        |
| <b>Morsolini 2017</b> <sup>156</sup> | C/S | Patient at 31 weeks with mitral prothesis thrombosis complicated by heart failure      | VA         | 1.5      | PNA                                                                             | No | N/A                                           | None                                                                           | No | Low anticoagulation used with goal PTT 40-50, all had heparin gtt and it was held during c/s                                        |
| <b>Morsolini 2017</b> <sup>156</sup> | C/S | Patient at 31 weeks with PAH                                                           | VA         | 0.916667 | Uterine bleeding                                                                | No | N/A                                           | None                                                                           | No | Low anticoagulation used with goal PTT 40-50, all had heparin gtt and it was held during c/s                                        |
| <b>Panarello 2010</b> <sup>165</sup> | C/S | H1N1 ARDS                                                                              |            |          | None reported                                                                   |    |                                               |                                                                                |    | N/A                                                                                                                                 |

|                                      |     |                                                                                                                                            |    |    |                                                                                                                                     |     |                          |                                                                                |     |                                                                                                                              |
|--------------------------------------|-----|--------------------------------------------------------------------------------------------------------------------------------------------|----|----|-------------------------------------------------------------------------------------------------------------------------------------|-----|--------------------------|--------------------------------------------------------------------------------|-----|------------------------------------------------------------------------------------------------------------------------------|
| <b>Panarello 2011</b> <sup>166</sup> | C/S | 38 year old at 25 weeks with H1N1 ARDS                                                                                                     | VV | 35 | Cesarean delivery at 30 weeks to improve pulmonary mechanics, active bleeding ulcer                                                 | No  | N/A                      | Preterm delivery at 30 weeks, intracranial hemorrhage, intubation, NICU        | No  | On heparin for beginning of run, held for 2 hours prior to C/S then resumed 2 hours post-op with goal PTT 40-50              |
| <b>Park 2014</b> <sup>167</sup>      | C/S | 34 year old G2P1 at 37 weeks with PPCM EF 39% and worsening heart failure, planned VA ECMO prior to cesarean                               | VA | 6  | None                                                                                                                                | No  | N/A                      | NICU admission, respiratory support                                            | No  | Held of anticoagulation until 3 days postpartum, then started nafamostat mesilate                                            |
| <b>Radsel 2018</b> <sup>186</sup>    | VD  | 29 year old G1P0 at 23 weeks with H1N1 ARDS                                                                                                | VV | 10 | Decannulated on day 5 then recannulated, preterm labor, critical illness polyneuropathy, tracheostomy, discharged to rehabilitation | No  | N/A                      | Preterm delivery at 25 weeks, NICU, intubated, BPD, NAS from maternal sedation | No  | Had UFH goal PTT 40-50 then anti-Xa 0.2-0.3IU/mL prior to delivery, got protamine after delivery then lovenox postpartum     |
| <b>Satoh 2002</b> <sup>201</sup>     | C/S | 33 year old G1P0 at 18 weeks with PAH with mean PA pressure in 70s and worsening of symptoms; termination of pregnancy at 18 weeks on ECMO | VA | 19 | Coagulation of artificial lung requiring changing                                                                                   | Yes | Right heart failure      | Therapeutic abortion                                                           | Yes | Heparin bonding circuit, heparin bonding cannulae, ACT 140-150 and mention of use of anticoagulant but not explicitly stated |
| <b>Shamsah 2017</b> <sup>210</sup>   | VD  | 25 year old G2P1 at 26 weeks with PAH, heart failure s/p arrest during labor, delivered amidst CPR and ECMO cannulation                    | VA | 14 | Prepared for heart/lung transplant but abruptly decompensated and died                                                              | Yes | Worsening PAH after ECLS | Preterm delivery at 26 weeks, NICU                                             | N/A | N/A                                                                                                                          |
| <b>Sharma 2015</b> <sup>8</sup>      | VD  | Patient at 34 weeks with cardiogenic shock, likely viral etiology                                                                          | VA | 6  | STEMI, vaginal bleeding, clot in circuit                                                                                            | No  | N/A                      | Preterm delivery at 34 weeks, stillborn                                        | Yes | Heparin with ACT 160-180, PTT 50-80, TEG 2.5-3x normal                                                                       |
| <b>Sim 2012</b> <sup>213</sup>       | C/S | 28 year old at 26 weeks with refractory SVT with cardiogenic shock crashed to ECMO, had IUFD, had RFA, later cesarean delivery             | VA | 7  | None reported                                                                                                                       | No  | N/A                      | SAB at 26 weeks                                                                | Yes | N/A                                                                                                                          |

|                                         |      |                                                                                                                                                                                  |            |    |                                                                                                                           |     |                                               |                                                      |     |     |
|-----------------------------------------|------|----------------------------------------------------------------------------------------------------------------------------------------------------------------------------------|------------|----|---------------------------------------------------------------------------------------------------------------------------|-----|-----------------------------------------------|------------------------------------------------------|-----|-----|
| <b>Takacs 2018</b> <sup>221</sup>       | VAVD | 21 year old G3P2 at 24 weeks with cardiac arrest with CPR, rupture of membranes during resuscitation, pulmonary contusions and ARDS, received enoxaparin, developed IUFD and DIC | VA         | 7  | SAB during collapse, DIC while on ECLS, possibly due to IUFD so underwent IOL, VAVD, retained POC, subsequent D&C on ECMO | No  | N/A                                           | IUFD prior to ECLS                                   | N/A | N/A |
| <b>Vitolo 2017</b> <sup>233</sup>       | C/S  | 31 year old at 32 weeks with PAH, scheduled cesarean delivery with planned pre-incision ECMO                                                                                     | VA         | 1  | Urgent re-laparotomy for bleeding on POD3, thought not to be related to ECMO                                              | No  | N/A                                           | Preterm delivery at 32 weeks, NICU admission         | No  | N/A |
| <b>Wang 2015</b> <sup>235</sup>         | VD   | 29 year old at 27 year weeks with H7N9 influenza ARDS                                                                                                                            | VV then VA | 19 | Heart failure, sepsis due to acinetobacter, PE; VV 4 days VA 15 days                                                      | Yes | Pulmonary embolism 3 days after decannulation | SAB delivered 4 days after loss of fetal heart tones | Yes | N/A |
| <b>Wertaschnigg 2017</b> <sup>239</sup> | VD   | Patient at 24 weeks with H1N1 ARDS                                                                                                                                               | VV         |    | None reported                                                                                                             | No  | N/A                                           | Preterm labor at 26 weeks, NICU                      | No  | N/A |

ECLS = extracorporeal life support; VD = vaginal delivery, C/S = cesarean delivery, VV = venovenous, VA = venoarterial, iLA = interventional lung assist, SAB = spontaneous abortion, IUFD = intrauterine fetal death, NICU = neonatal intensive care unit, IVH = intraventricular hemorrhage; gtt = infusion; PTT = partial thromboplastin time; DIC = disseminated intravascular coagulation; ARDS = acute respiratory distress syndrome; DVT = deep vein thrombosis; PAH = pulmonary arterial hypertension; LAM = lymphangiomyomatosis; iLA = interventional lung assist; ECCO<sub>2</sub> removal = extracorporeal carbon dioxide removal; HELLP = hemolysis, elevated liver enzymes, low platelet syndrome; MV = mitral valve; ACT = activated clotting time; PNA = pneumonia; CHD = congenital heart disease; IABP = intra-aortic balloon pump; PPCM = peripartum cardiomyopathy; SVC = superior vena cava; PA = pulmonary artery; EF = ejection fraction; CPR = cardiopulmonary resuscitation; STEMI = ST elevation myocardial infarction; TEG = thromboelastography; SVT = supraventricular tachycardia; RFA = radiofrequency ablation; IOL = induction of labor; VAVD = vacuum assisted vaginal delivery; POC = products of conception; D&C = dilation and curettage

**Table S3. Cases that included cardiopulmonary bypass (CPB) (n = 11).**

| Study (Author, Year)                | Stage of Pregnancy     | Postpartum Day | Delivery  | Disease Process/Indication                                                                                                                                                                              | ECLS Type | ECLS Duration (Days) | Maternal Complications                                                                    | Maternal Mortality | Fetal Complications                                    | Fetal Mortality |
|-------------------------------------|------------------------|----------------|-----------|---------------------------------------------------------------------------------------------------------------------------------------------------------------------------------------------------------|-----------|----------------------|-------------------------------------------------------------------------------------------|--------------------|--------------------------------------------------------|-----------------|
| <b>Arlt 2009</b> <sup>40</sup>      | Immediately postpartum | 0.166666667    | C/S       | 27 year old with massive PE complicated by PEA given tPA, ECMO transported with hand-held system, underwent emergent hysterectomy and pulmonary thrombectomy under ECMO                                 | VA        | 4                    | Vaginal and endotracheal bleeding after thrombolysis, emergency hysterectomy              | No                 | N/A                                                    | No              |
| <b>Bruch 2013</b> <sup>54</sup>     | Antepartum             | N/A            | VD        | 31 year old G1P0 at 19 weeks with PE and cardiac arrest requiring CPR, ECLS and thrombectomy, stillbirth at 19 weeks requiring D&C                                                                      | VA        | 5                    | Delivered on ECMO, bleeding requiring transfusions                                        | No                 | SAB on ECMO                                            | Yes             |
| <b>Chuang 2015</b> <sup>63</sup>    | Postpartum             | 2              | C/S       | 29 year old G1P1 with PE s/p cardiac arrest and CPR underwent PTE 2 days after admission                                                                                                                | VA        | 2                    | Burn injuries from resuscitation in ED, staph and influenza infections, discharged day 43 | No                 | N/A                                                    | N/A             |
| <b>DiLorenzo 2016</b> <sup>72</sup> | Antepartum             | N/A            | C/S       | Patient at 33 weeks with mitral valve regurgitation due to prosthetic valve thrombosis with NYHA Class III HF planned cesarean after VA ECMO and MV replacement, ECMO in OR immediately before delivery | VA        | 2                    | Delivered on ECMO                                                                         | No                 | N/A                                                    | No              |
| <b>Evans 2014</b> <sup>76</sup>     | Postpartum             | 14             | Not noted | Patient with ACS diagnosed with SCAD to the LAD with EF 15-20% s/p CABG with failure to wean from CPB                                                                                                   | VA        | 10                   | Rehab                                                                                     | No                 | None                                                   | N/A             |
| <b>Fabricius 2001</b> <sup>78</sup> | Immediately postpartum | 0              | C/S       | 32 year old G1P0 at 39 weeks had cesarean delivery for fetal tachycardia, found to have type A aortic dissection with cardiogenic shock                                                                 | VA        | 4                    | None                                                                                      | No                 | None                                                   | No              |
| <b>Fayad 2007</b> <sup>81</sup>     | Postpartum             | <7 days        | C/S       | 31 year old delivered at 30 weeks with post-rheumatic mitral stenosis, dilated RV had CPB then planned transition to ECMO                                                                               | VA        | 9                    | Ventilator associated pneumonia with pseudomonas then sepsis, pre-operative renal failure | Yes                | Preterm delivery at 30 weeks, NICU respiratory support | N/A             |



|                                          |                        |    |     |                                                                                                                                                                                              |     |    |                                                          |    |      |     |
|------------------------------------------|------------------------|----|-----|----------------------------------------------------------------------------------------------------------------------------------------------------------------------------------------------|-----|----|----------------------------------------------------------|----|------|-----|
| <b>Halldorsdottir 2016</b> <sup>98</sup> | Immediately postpartum | 0  | C/S | 29 year old G3P1 at 37 weeks with cardiogenic shock after cesarean delivery due to MV prosthesis thrombosis with severe hypoxemia, cannulated 2 hours postpartum                             | VA  | 3  | Weaned from CPB after MV replacement, on ECMO before CPB | No | None | No  |
| <b>Hansen 2012</b> <sup>100</sup>        | Postpartum             | 6  | D&C | 38 year old with septic shock for retained products of conception, underwent D&C before IABP and then VA ECMO, found to have papillary muscle rupture, had 2 days ECMO before MV replacement | VA  | 2  | Severe aortic insufficiency, went back to OR on POD9     | No | N/A  | N/A |
| <b>Knapp 2016</b> <sup>127</sup>         | Postpartum             | 16 | C/S | 30 year old with SCAD s/p multiple stents s/p CABG with saphenous vein grafts to LAD and circumflex                                                                                          | VA  | 4  | Post-CABG biventricular dysfunction EF 25%               | No | N/A  | N/A |
| <b>Wei 2011</b> <sup>236</sup>           | Postpartum             | 2  | C/S | 36 year old G1P1 delivered at 37 weeks with PE and cardiac arrest, cardiac massage to ECMO then pulmonary thrombectomy                                                                       | N/A | <1 | None                                                     | No | N/A  | N/A |

ECLS = extracorporeal life support; VD = vaginal delivery, C/S = cesarean delivery, D&C = dilation and curettage, VV = venovenous, VA = venoarterial, SAB = spontaneous abortion, NICU = neonatal intensive care unit; PE = pulmonary embolism; PEA = pulseless electrical activity; tPA = tissue plasminogen activator; CPR = cardiopulmonary resuscitation; PTE = pulmonary thrombectomy; ED = emergency department; OR = operating room; ACS = acute coronary syndrome; LAD = left anterior descending coronary artery; POD = post-operative day; CABG = coronary arterial bypass graft; MV = mitral valve; SCAD = spontaneous coronary artery dissection
